# Supplementary material for: The Long Non-Coding RNA FAM222A-AS1 Negatively Modulates MiR-Let-7f to Promote Colorectal Cancer Progression
Source: Front Oncol. 2022 May 12;12:764621. doi: 10.3389/fonc.2022.764621 (PMC9133450; doi:10.3389/fonc.2022.764621)
Supplement: Supplementary file 10 [file Table_9.xlsx]

## Sheet: denseDataOnlyDownload
sample	samples	_study	_sample_type	_primary_site	TCGA_GTEX_main_category	FAM222A_AS1
GTEX-13G51-2126-SM-5IJD9	GTEX-13G51-2126-SM-5IJD9	GTEX	Normal Tissue	Colon	GTEX Colon	3.737
GTEX-ZE9C-2126-SM-4WKGY	GTEX-ZE9C-2126-SM-4WKGY	GTEX	Normal Tissue	Colon	GTEX Colon	3.719
GTEX-XXEK-1826-SM-4BRVC	GTEX-XXEK-1826-SM-4BRVC	GTEX	Normal Tissue	Colon	GTEX Colon	3.596
GTEX-XGQ4-1726-SM-4RH4G	GTEX-XGQ4-1726-SM-4RH4G	GTEX	Normal Tissue	Colon	GTEX Colon	3.434
GTEX-146FQ-1926-SM-5NQBY	GTEX-146FQ-1926-SM-5NQBY	GTEX	Normal Tissue	Colon	GTEX Colon	3.266
GTEX-13W3W-2126-SM-5K7UX	GTEX-13W3W-2126-SM-5K7UX	GTEX	Normal Tissue	Colon	GTEX Colon	3.164
GTEX-12ZZY-2726-SM-5EQ45	GTEX-12ZZY-2726-SM-5EQ45	GTEX	Normal Tissue	Colon	GTEX Colon	3.068
GTEX-YECK-2826-SM-5IFHF	GTEX-YECK-2826-SM-5IFHF	GTEX	Normal Tissue	Colon	GTEX Colon	3.026
GTEX-YJ8A-1726-SM-5P9IQ	GTEX-YJ8A-1726-SM-5P9IQ	GTEX	Normal Tissue	Colon	GTEX Colon	3.009
GTEX-QDVJ-1326-SM-48U1X	GTEX-QDVJ-1326-SM-48U1X	GTEX	Normal Tissue	Colon	GTEX Colon	2.995
GTEX-145MH-2726-SM-5QGQ6	GTEX-145MH-2726-SM-5QGQ6	GTEX	Normal Tissue	Colon	GTEX Colon	2.831
GTEX-11ZTS-1526-SM-5N9G7	GTEX-11ZTS-1526-SM-5N9G7	GTEX	Normal Tissue	Colon	GTEX Colon	2.814
GTEX-13OW8-2726-SM-5L3FZ	GTEX-13OW8-2726-SM-5L3FZ	GTEX	Normal Tissue	Colon	GTEX Colon	2.809
GTEX-X4EO-2726-SM-4E3HS	GTEX-X4EO-2726-SM-4E3HS	GTEX	Normal Tissue	Colon	GTEX Colon	2.717
GTEX-ZVT3-2826-SM-5GU6A	GTEX-ZVT3-2826-SM-5GU6A	GTEX	Normal Tissue	Colon	GTEX Colon	2.698
GTEX-145LS-2926-SM-5O99G	GTEX-145LS-2926-SM-5O99G	GTEX	Normal Tissue	Colon	GTEX Colon	2.681
GTEX-X15G-1326-SM-4PQZJ	GTEX-X15G-1326-SM-4PQZJ	GTEX	Normal Tissue	Colon	GTEX Colon	2.668
GTEX-11EI6-2626-SM-5PNVT	GTEX-11EI6-2626-SM-5PNVT	GTEX	Normal Tissue	Colon	GTEX Colon	2.662
GTEX-WHPG-1626-SM-4M1ZL	GTEX-WHPG-1626-SM-4M1ZL	GTEX	Normal Tissue	Colon	GTEX Colon	2.638
GTEX-11GS4-1826-SM-5HL4T	GTEX-11GS4-1826-SM-5HL4T	GTEX	Normal Tissue	Colon	GTEX Colon	2.633
GTEX-147GR-2826-SM-5RQK8	GTEX-147GR-2826-SM-5RQK8	GTEX	Normal Tissue	Colon	GTEX Colon	2.631
GTEX-ZYFC-2626-SM-5NQ6S	GTEX-ZYFC-2626-SM-5NQ6S	GTEX	Normal Tissue	Colon	GTEX Colon	2.625
GTEX-147JS-2626-SM-5S2UX	GTEX-147JS-2626-SM-5S2UX	GTEX	Normal Tissue	Colon	GTEX Colon	2.617
GTEX-XXEK-1926-SM-4BRVD	GTEX-XXEK-1926-SM-4BRVD	GTEX	Normal Tissue	Colon	GTEX Colon	2.617
GTEX-139YR-2126-SM-5KM11	GTEX-139YR-2126-SM-5KM11	GTEX	Normal Tissue	Colon	GTEX Colon	2.594
GTEX-Y114-1526-SM-4TT79	GTEX-Y114-1526-SM-4TT79	GTEX	Normal Tissue	Colon	GTEX Colon	2.589
GTEX-XV7Q-2126-SM-4BRVX	GTEX-XV7Q-2126-SM-4BRVX	GTEX	Normal Tissue	Colon	GTEX Colon	2.575
GTEX-12696-1926-SM-5EGJT	GTEX-12696-1926-SM-5EGJT	GTEX	Normal Tissue	Colon	GTEX Colon	2.536
GTEX-11P82-1226-SM-5HL5P	GTEX-11P82-1226-SM-5HL5P	GTEX	Normal Tissue	Colon	GTEX Colon	2.527
GTEX-WQUQ-2626-SM-4MVNP	GTEX-WQUQ-2626-SM-4MVNP	GTEX	Normal Tissue	Colon	GTEX Colon	2.519
GTEX-11DXY-2026-SM-5N9CZ	GTEX-11DXY-2026-SM-5N9CZ	GTEX	Normal Tissue	Colon	GTEX Colon	2.436
GTEX-13CF2-1826-SM-5N9GK	GTEX-13CF2-1826-SM-5N9GK	GTEX	Normal Tissue	Colon	GTEX Colon	2.436
GTEX-11TUW-2026-SM-5EQL8	GTEX-11TUW-2026-SM-5EQL8	GTEX	Normal Tissue	Colon	GTEX Colon	2.434
GTEX-PLZ5-1126-SM-3P613	GTEX-PLZ5-1126-SM-3P613	GTEX	Normal Tissue	Colon	GTEX Colon	2.423
GTEX-11TUW-2326-SM-5EQMO	GTEX-11TUW-2326-SM-5EQMO	GTEX	Normal Tissue	Colon	GTEX Colon	2.407
GTEX-11P81-1126-SM-5GU5G	GTEX-11P81-1126-SM-5GU5G	GTEX	Normal Tissue	Colon	GTEX Colon	2.405
GTEX-131XE-0826-SM-5HL9W	GTEX-131XE-0826-SM-5HL9W	GTEX	Normal Tissue	Colon	GTEX Colon	2.376
GTEX-13111-1926-SM-5GCOL	GTEX-13111-1926-SM-5GCOL	GTEX	Normal Tissue	Colon	GTEX Colon	2.345
GTEX-131YS-2926-SM-5EGKI	GTEX-131YS-2926-SM-5EGKI	GTEX	Normal Tissue	Colon	GTEX Colon	2.338
GTEX-11ILO-2026-SM-5N9CQ	GTEX-11ILO-2026-SM-5N9CQ	GTEX	Normal Tissue	Colon	GTEX Colon	2.277
GTEX-111VG-2226-SM-5N9DU	GTEX-111VG-2226-SM-5N9DU	GTEX	Normal Tissue	Colon	GTEX Colon	2.274
GTEX-P4QT-1426-SM-3NMCX	GTEX-P4QT-1426-SM-3NMCX	GTEX	Normal Tissue	Colon	GTEX Colon	2.232
GTEX-ZYWO-1626-SM-5E44H	GTEX-ZYWO-1626-SM-5E44H	GTEX	Normal Tissue	Colon	GTEX Colon	2.209
GTEX-ZTTD-2626-SM-57WEX	GTEX-ZTTD-2626-SM-57WEX	GTEX	Normal Tissue	Colon	GTEX Colon	2.195
GTEX-11EQ9-1526-SM-5PNY7	GTEX-11EQ9-1526-SM-5PNY7	GTEX	Normal Tissue	Colon	GTEX Colon	2.193
GTEX-X15G-1526-SM-4PQZM	GTEX-X15G-1526-SM-4PQZM	GTEX	Normal Tissue	Colon	GTEX Colon	2.173
GTEX-13FHP-2426-SM-5KLZ5	GTEX-13FHP-2426-SM-5KLZ5	GTEX	Normal Tissue	Colon	GTEX Colon	2.162
GTEX-ZVZP-2026-SM-57WB3	GTEX-ZVZP-2026-SM-57WB3	GTEX	Normal Tissue	Colon	GTEX Colon	2.142
GTEX-WHWD-1226-SM-4OOS1	GTEX-WHWD-1226-SM-4OOS1	GTEX	Normal Tissue	Colon	GTEX Colon	2.099
GTEX-11EQ8-2626-SM-5N9BO	GTEX-11EQ8-2626-SM-5N9BO	GTEX	Normal Tissue	Colon	GTEX Colon	2.082
GTEX-13D11-0626-SM-5LZYY	GTEX-13D11-0626-SM-5LZYY	GTEX	Normal Tissue	Colon	GTEX Colon	2.079
GTEX-T6MO-0826-SM-4DM51	GTEX-T6MO-0826-SM-4DM51	GTEX	Normal Tissue	Colon	GTEX Colon	2.062
GTEX-WYVS-1126-SM-4SOJX	GTEX-WYVS-1126-SM-4SOJX	GTEX	Normal Tissue	Colon	GTEX Colon	2.05
GTEX-117YW-1826-SM-5PNY5	GTEX-117YW-1826-SM-5PNY5	GTEX	Normal Tissue	Colon	GTEX Colon	2
GTEX-RM2N-0926-SM-48FD1	GTEX-RM2N-0926-SM-48FD1	GTEX	Normal Tissue	Colon	GTEX Colon	1.996
GTEX-13OW6-2226-SM-5N9FL	GTEX-13OW6-2226-SM-5N9FL	GTEX	Normal Tissue	Colon	GTEX Colon	1.97
GTEX-Q2AI-0926-SM-48U1F	GTEX-Q2AI-0926-SM-48U1F	GTEX	Normal Tissue	Colon	GTEX Colon	1.961
GTEX-ZEX8-1926-SM-4WKFR	GTEX-ZEX8-1926-SM-4WKFR	GTEX	Normal Tissue	Colon	GTEX Colon	1.961
GTEX-11GSP-1626-SM-5986N	GTEX-11GSP-1626-SM-5986N	GTEX	Normal Tissue	Colon	GTEX Colon	1.947
GTEX-ZY6K-1326-SM-5GZWP	GTEX-ZY6K-1326-SM-5GZWP	GTEX	Normal Tissue	Colon	GTEX Colon	1.944
GTEX-ZVP2-1526-SM-5NQ82	GTEX-ZVP2-1526-SM-5NQ82	GTEX	Normal Tissue	Colon	GTEX Colon	1.941
GTEX-13QBU-1826-SM-5IJG3	GTEX-13QBU-1826-SM-5IJG3	GTEX	Normal Tissue	Colon	GTEX Colon	1.94
GTEX-144GM-1226-SM-5LU52	GTEX-144GM-1226-SM-5LU52	GTEX	Normal Tissue	Colon	GTEX Colon	1.929
GTEX-RU1J-1326-SM-46MUL	GTEX-RU1J-1326-SM-46MUL	GTEX	Normal Tissue	Colon	GTEX Colon	1.904
GTEX-ZV6S-1126-SM-57WE9	GTEX-ZV6S-1126-SM-57WE9	GTEX	Normal Tissue	Colon	GTEX Colon	1.9
GTEX-11ZU8-1126-SM-5EQ5K	GTEX-11ZU8-1126-SM-5EQ5K	GTEX	Normal Tissue	Colon	GTEX Colon	1.881
GTEX-131XG-1526-SM-5GCNQ	GTEX-131XG-1526-SM-5GCNQ	GTEX	Normal Tissue	Colon	GTEX Colon	1.862
GTEX-ZAB4-2426-SM-5HL8A	GTEX-ZAB4-2426-SM-5HL8A	GTEX	Normal Tissue	Colon	GTEX Colon	1.861
GTEX-Y5LM-1426-SM-5RQJL	GTEX-Y5LM-1426-SM-5RQJL	GTEX	Normal Tissue	Colon	GTEX Colon	1.843
GTEX-11DXX-1826-SM-5H126	GTEX-11DXX-1826-SM-5H126	GTEX	Normal Tissue	Colon	GTEX Colon	1.839
GTEX-13FH7-1626-SM-5J2O9	GTEX-13FH7-1626-SM-5J2O9	GTEX	Normal Tissue	Colon	GTEX Colon	1.836
GTEX-XMK1-1726-SM-4B64Z	GTEX-XMK1-1726-SM-4B64Z	GTEX	Normal Tissue	Colon	GTEX Colon	1.827
GTEX-111CU-1426-SM-5GZYP	GTEX-111CU-1426-SM-5GZYP	GTEX	Normal Tissue	Colon	GTEX Colon	1.82
GTEX-147JS-2526-SM-5S2Q8	GTEX-147JS-2526-SM-5S2Q8	GTEX	Normal Tissue	Colon	GTEX Colon	1.816
GTEX-XYKS-2226-SM-4E3IU	GTEX-XYKS-2226-SM-4E3IU	GTEX	Normal Tissue	Colon	GTEX Colon	1.798
GTEX-PWOO-1326-SM-48TCJ	GTEX-PWOO-1326-SM-48TCJ	GTEX	Normal Tissue	Colon	GTEX Colon	1.795
GTEX-1128S-1626-SM-5H12O	GTEX-1128S-1626-SM-5H12O	GTEX	Normal Tissue	Colon	GTEX Colon	1.783
GTEX-ZZ64-0726-SM-5GZX4	GTEX-ZZ64-0726-SM-5GZX4	GTEX	Normal Tissue	Colon	GTEX Colon	1.756
GTEX-S7SF-1926-SM-4AT5B	GTEX-S7SF-1926-SM-4AT5B	GTEX	Normal Tissue	Colon	GTEX Colon	1.749
GTEX-Z93S-2426-SM-5HL8N	GTEX-Z93S-2426-SM-5HL8N	GTEX	Normal Tissue	Colon	GTEX Colon	1.744
GTEX-13SLW-2826-SM-5Q5ES	GTEX-13SLW-2826-SM-5Q5ES	GTEX	Normal Tissue	Colon	GTEX Colon	1.74
GTEX-ZP4G-1726-SM-4WWCM	GTEX-ZP4G-1726-SM-4WWCM	GTEX	Normal Tissue	Colon	GTEX Colon	1.734
GTEX-11ZVC-2126-SM-5EGJ1	GTEX-11ZVC-2126-SM-5EGJ1	GTEX	Normal Tissue	Colon	GTEX Colon	1.727
GTEX-R53T-1326-SM-48FCQ	GTEX-R53T-1326-SM-48FCQ	GTEX	Normal Tissue	Colon	GTEX Colon	1.706
GTEX-Z93S-2626-SM-57WBX	GTEX-Z93S-2626-SM-57WBX	GTEX	Normal Tissue	Colon	GTEX Colon	1.684
GTEX-Y5LM-1526-SM-4VDTA	GTEX-Y5LM-1526-SM-4VDTA	GTEX	Normal Tissue	Colon	GTEX Colon	1.618
GTEX-145ME-0826-SM-5O9AF	GTEX-145ME-0826-SM-5O9AF	GTEX	Normal Tissue	Colon	GTEX Colon	1.593
GTEX-Y114-1626-SM-4TT7I	GTEX-Y114-1626-SM-4TT7I	GTEX	Normal Tissue	Colon	GTEX Colon	1.577
GTEX-132AR-2826-SM-5IJFV	GTEX-132AR-2826-SM-5IJFV	GTEX	Normal Tissue	Colon	GTEX Colon	1.552
GTEX-14E6E-1526-SM-5RQIG	GTEX-14E6E-1526-SM-5RQIG	GTEX	Normal Tissue	Colon	GTEX Colon	1.55
GTEX-12ZZX-2726-SM-5N9FT	GTEX-12ZZX-2726-SM-5N9FT	GTEX	Normal Tissue	Colon	GTEX Colon	1.546
GTEX-V955-1626-SM-4JBHJ	GTEX-V955-1626-SM-4JBHJ	GTEX	Normal Tissue	Colon	GTEX Colon	1.538
GTEX-ZVT4-2626-SM-5N9GJ	GTEX-ZVT4-2626-SM-5N9GJ	GTEX	Normal Tissue	Colon	GTEX Colon	1.454
GTEX-XUW1-1826-SM-4BOQD	GTEX-XUW1-1826-SM-4BOQD	GTEX	Normal Tissue	Colon	GTEX Colon	1.449
GTEX-11ZTT-1626-SM-5EQKR	GTEX-11ZTT-1626-SM-5EQKR	GTEX	Normal Tissue	Colon	GTEX Colon	1.425
GTEX-TML8-1326-SM-4DXTO	GTEX-TML8-1326-SM-4DXTO	GTEX	Normal Tissue	Colon	GTEX Colon	1.424
GTEX-12C56-0626-SM-5EGGC	GTEX-12C56-0626-SM-5EGGC	GTEX	Normal Tissue	Colon	GTEX Colon	1.398
GTEX-XUW1-1926-SM-4BOP1	GTEX-XUW1-1926-SM-4BOP1	GTEX	Normal Tissue	Colon	GTEX Colon	1.388
GTEX-12WSJ-1426-SM-5GCON	GTEX-12WSJ-1426-SM-5GCON	GTEX	Normal Tissue	Colon	GTEX Colon	1.384
GTEX-WFON-1426-SM-4LVMT	GTEX-WFON-1426-SM-4LVMT	GTEX	Normal Tissue	Colon	GTEX Colon	1.359
GTEX-PWCY-1026-SM-48TD4	GTEX-PWCY-1026-SM-48TD4	GTEX	Normal Tissue	Colon	GTEX Colon	1.359
GTEX-UPIC-1726-SM-4IHKG	GTEX-UPIC-1726-SM-4IHKG	GTEX	Normal Tissue	Colon	GTEX Colon	1.349
GTEX-132AR-2726-SM-5PNVN	GTEX-132AR-2726-SM-5PNVN	GTEX	Normal Tissue	Colon	GTEX Colon	1.337
GTEX-1122O-1526-SM-5N9CL	GTEX-1122O-1526-SM-5N9CL	GTEX	Normal Tissue	Colon	GTEX Colon	1.317
GTEX-XBED-1526-SM-4AT5W	GTEX-XBED-1526-SM-4AT5W	GTEX	Normal Tissue	Colon	GTEX Colon	1.316
GTEX-W5WG-2026-SM-4LMIB	GTEX-W5WG-2026-SM-4LMIB	GTEX	Normal Tissue	Colon	GTEX Colon	1.308
GTEX-13S86-1626-SM-5Q5C5	GTEX-13S86-1626-SM-5Q5C5	GTEX	Normal Tissue	Colon	GTEX Colon	1.304
GTEX-13VXT-2026-SM-5L3EW	GTEX-13VXT-2026-SM-5L3EW	GTEX	Normal Tissue	Colon	GTEX Colon	1.301
GTEX-ZDTS-2726-SM-5L3E2	GTEX-ZDTS-2726-SM-5L3E2	GTEX	Normal Tissue	Colon	GTEX Colon	1.295
GTEX-13O3O-2526-SM-5L3DR	GTEX-13O3O-2526-SM-5L3DR	GTEX	Normal Tissue	Colon	GTEX Colon	1.292
GTEX-SNOS-1226-SM-4DM5H	GTEX-SNOS-1226-SM-4DM5H	GTEX	Normal Tissue	Colon	GTEX Colon	1.284
GTEX-PX3G-1426-SM-48U1J	GTEX-PX3G-1426-SM-48U1J	GTEX	Normal Tissue	Colon	GTEX Colon	1.284
GTEX-111YS-1826-SM-5GIEP	GTEX-111YS-1826-SM-5GIEP	GTEX	Normal Tissue	Colon	GTEX Colon	1.28
GTEX-145LT-0926-SM-5LU9C	GTEX-145LT-0926-SM-5LU9C	GTEX	Normal Tissue	Colon	GTEX Colon	1.273
GTEX-WHSB-0926-SM-4M1XJ	GTEX-WHSB-0926-SM-4M1XJ	GTEX	Normal Tissue	Colon	GTEX Colon	1.27
GTEX-117XS-2226-SM-5GIE1	GTEX-117XS-2226-SM-5GIE1	GTEX	Normal Tissue	Colon	GTEX Colon	1.267
GTEX-ZAB4-2226-SM-5HL97	GTEX-ZAB4-2226-SM-5HL97	GTEX	Normal Tissue	Colon	GTEX Colon	1.263
GTEX-ZAJG-2626-SM-5S2NU	GTEX-ZAJG-2626-SM-5S2NU	GTEX	Normal Tissue	Colon	GTEX Colon	1.261
GTEX-YB5E-1626-SM-5IFIQ	GTEX-YB5E-1626-SM-5IFIQ	GTEX	Normal Tissue	Colon	GTEX Colon	1.26
GTEX-XAJ8-0426-SM-47JYJ	GTEX-XAJ8-0426-SM-47JYJ	GTEX	Normal Tissue	Colon	GTEX Colon	1.252
GTEX-ZE7O-2626-SM-51MSS	GTEX-ZE7O-2626-SM-51MSS	GTEX	Normal Tissue	Colon	GTEX Colon	1.248
GTEX-13O61-1626-SM-5KM3T	GTEX-13O61-1626-SM-5KM3T	GTEX	Normal Tissue	Colon	GTEX Colon	1.246
GTEX-QCQG-1626-SM-48U26	GTEX-QCQG-1626-SM-48U26	GTEX	Normal Tissue	Colon	GTEX Colon	1.244
GTEX-ZXES-1626-SM-5NQ7L	GTEX-ZXES-1626-SM-5NQ7L	GTEX	Normal Tissue	Colon	GTEX Colon	1.24
GTEX-WY7C-1926-SM-4ONCI	GTEX-WY7C-1926-SM-4ONCI	GTEX	Normal Tissue	Colon	GTEX Colon	1.24
GTEX-11DXZ-1726-SM-5H12M	GTEX-11DXZ-1726-SM-5H12M	GTEX	Normal Tissue	Colon	GTEX Colon	1.239
GTEX-WRHK-1126-SM-4MVOJ	GTEX-WRHK-1126-SM-4MVOJ	GTEX	Normal Tissue	Colon	GTEX Colon	1.232
GTEX-12KS4-2426-SM-5LU8P	GTEX-12KS4-2426-SM-5LU8P	GTEX	Normal Tissue	Colon	GTEX Colon	1.229
GTEX-ZV7C-1526-SM-5NQ72	GTEX-ZV7C-1526-SM-5NQ72	GTEX	Normal Tissue	Colon	GTEX Colon	1.228
GTEX-ZY6K-1226-SM-5GZYL	GTEX-ZY6K-1226-SM-5GZYL	GTEX	Normal Tissue	Colon	GTEX Colon	1.226
GTEX-13W3W-2226-SM-5LU4M	GTEX-13W3W-2226-SM-5LU4M	GTEX	Normal Tissue	Colon	GTEX Colon	1.22
GTEX-ZYT6-2826-SM-5GICX	GTEX-ZYT6-2826-SM-5GICX	GTEX	Normal Tissue	Colon	GTEX Colon	1.215
GTEX-WXYG-1726-SM-4ONCU	GTEX-WXYG-1726-SM-4ONCU	GTEX	Normal Tissue	Colon	GTEX Colon	1.213
GTEX-WEY5-1426-SM-4LMJ3	GTEX-WEY5-1426-SM-4LMJ3	GTEX	Normal Tissue	Colon	GTEX Colon	1.21
GTEX-ZZ64-0826-SM-5E449	GTEX-ZZ64-0826-SM-5E449	GTEX	Normal Tissue	Colon	GTEX Colon	1.207
GTEX-S4P3-1226-SM-4AD4Y	GTEX-S4P3-1226-SM-4AD4Y	GTEX	Normal Tissue	Colon	GTEX Colon	1.206
GTEX-WY7C-1626-SM-4ONC8	GTEX-WY7C-1626-SM-4ONC8	GTEX	Normal Tissue	Colon	GTEX Colon	1.205
GTEX-YF7O-1726-SM-5IFJ9	GTEX-YF7O-1726-SM-5IFJ9	GTEX	Normal Tissue	Colon	GTEX Colon	1.204
GTEX-111YS-1626-SM-5GZZ9	GTEX-111YS-1626-SM-5GZZ9	GTEX	Normal Tissue	Colon	GTEX Colon	1.203
GTEX-13D11-0826-SM-5KLZJ	GTEX-13D11-0826-SM-5KLZJ	GTEX	Normal Tissue	Colon	GTEX Colon	1.198
GTEX-13OW5-2626-SM-5MR3M	GTEX-13OW5-2626-SM-5MR3M	GTEX	Normal Tissue	Colon	GTEX Colon	1.192
GTEX-117YX-0526-SM-5EGJH	GTEX-117YX-0526-SM-5EGJH	GTEX	Normal Tissue	Colon	GTEX Colon	1.188
GTEX-Y3I4-1426-SM-4TT9C	GTEX-Y3I4-1426-SM-4TT9C	GTEX	Normal Tissue	Colon	GTEX Colon	1.187
GTEX-12WSL-1826-SM-5LZW9	GTEX-12WSL-1826-SM-5LZW9	GTEX	Normal Tissue	Colon	GTEX Colon	1.182
GTEX-146FH-2426-SM-5Q5EW	GTEX-146FH-2426-SM-5Q5EW	GTEX	Normal Tissue	Colon	GTEX Colon	1.176
GTEX-YEC3-2426-SM-5IFJR	GTEX-YEC3-2426-SM-5IFJR	GTEX	Normal Tissue	Colon	GTEX Colon	1.175
GTEX-ZGAY-2126-SM-4YCFB	GTEX-ZGAY-2126-SM-4YCFB	GTEX	Normal Tissue	Colon	GTEX Colon	1.172
GTEX-12BJ1-2126-SM-5BC5O	GTEX-12BJ1-2126-SM-5BC5O	GTEX	Normal Tissue	Colon	GTEX Colon	1.164
GTEX-13FH7-1526-SM-5J2N6	GTEX-13FH7-1526-SM-5J2N6	GTEX	Normal Tissue	Colon	GTEX Colon	1.152
GTEX-ZF29-1726-SM-4WKFV	GTEX-ZF29-1726-SM-4WKFV	GTEX	Normal Tissue	Colon	GTEX Colon	1.139
GTEX-ZF2S-1926-SM-4WWAN	GTEX-ZF2S-1926-SM-4WWAN	GTEX	Normal Tissue	Colon	GTEX Colon	1.134
GTEX-ZF29-1826-SM-4WKG8	GTEX-ZF29-1826-SM-4WKG8	GTEX	Normal Tissue	Colon	GTEX Colon	1.129
GTEX-131XE-1026-SM-5EGKE	GTEX-131XE-1026-SM-5EGKE	GTEX	Normal Tissue	Colon	GTEX Colon	1.127
GTEX-QDVN-1326-SM-48TZ3	GTEX-QDVN-1326-SM-48TZ3	GTEX	Normal Tissue	Colon	GTEX Colon	1.124
GTEX-12WSM-1426-SM-5GCPA	GTEX-12WSM-1426-SM-5GCPA	GTEX	Normal Tissue	Colon	GTEX Colon	1.115
GTEX-ZLV1-1326-SM-4WWER	GTEX-ZLV1-1326-SM-4WWER	GTEX	Normal Tissue	Colon	GTEX Colon	1.11
GTEX-VJYA-2026-SM-4KL1K	GTEX-VJYA-2026-SM-4KL1K	GTEX	Normal Tissue	Colon	GTEX Colon	1.107
GTEX-Y3I4-1126-SM-4TT7Y	GTEX-Y3I4-1126-SM-4TT7Y	GTEX	Normal Tissue	Colon	GTEX Colon	1.103
GTEX-1212Z-1826-SM-5FQSH	GTEX-1212Z-1826-SM-5FQSH	GTEX	Normal Tissue	Colon	GTEX Colon	1.089
GTEX-QMRM-1226-SM-447C6	GTEX-QMRM-1226-SM-447C6	GTEX	Normal Tissue	Colon	GTEX Colon	1.086
GTEX-11DXZ-1626-SM-5GIDI	GTEX-11DXZ-1626-SM-5GIDI	GTEX	Normal Tissue	Colon	GTEX Colon	1.086
GTEX-12WSG-2426-SM-5EQLZ	GTEX-12WSG-2426-SM-5EQLZ	GTEX	Normal Tissue	Colon	GTEX Colon	1.083
GTEX-1122O-1426-SM-5H11R	GTEX-1122O-1426-SM-5H11R	GTEX	Normal Tissue	Colon	GTEX Colon	1.082
GTEX-Y8LW-1226-SM-4WWDP	GTEX-Y8LW-1226-SM-4WWDP	GTEX	Normal Tissue	Colon	GTEX Colon	1.077
GTEX-XV7Q-2226-SM-4BRVY	GTEX-XV7Q-2226-SM-4BRVY	GTEX	Normal Tissue	Colon	GTEX Colon	1.068
GTEX-ZPU1-1926-SM-57WDT	GTEX-ZPU1-1926-SM-57WDT	GTEX	Normal Tissue	Colon	GTEX Colon	1.066
GTEX-11I78-1326-SM-5PNY9	GTEX-11I78-1326-SM-5PNY9	GTEX	Normal Tissue	Colon	GTEX Colon	1.065
GTEX-ZF2S-1826-SM-4WKFF	GTEX-ZF2S-1826-SM-4WKFF	GTEX	Normal Tissue	Colon	GTEX Colon	1.053
GTEX-11DXX-1926-SM-5EGJK	GTEX-11DXX-1926-SM-5EGJK	GTEX	Normal Tissue	Colon	GTEX Colon	1.053
GTEX-13FHO-2726-SM-5K7VG	GTEX-13FHO-2726-SM-5K7VG	GTEX	Normal Tissue	Colon	GTEX Colon	1.052
GTEX-ZQG8-2426-SM-57WEE	GTEX-ZQG8-2426-SM-57WEE	GTEX	Normal Tissue	Colon	GTEX Colon	1.051
GTEX-14AS3-1126-SM-5Q5CR	GTEX-14AS3-1126-SM-5Q5CR	GTEX	Normal Tissue	Colon	GTEX Colon	1.046
GTEX-11P81-1426-SM-5P9JN	GTEX-11P81-1426-SM-5P9JN	GTEX	Normal Tissue	Colon	GTEX Colon	1.04
GTEX-ZPU1-1726-SM-4WWFV	GTEX-ZPU1-1726-SM-4WWFV	GTEX	Normal Tissue	Colon	GTEX Colon	1.036
GTEX-117YX-0826-SM-5H11J	GTEX-117YX-0826-SM-5H11J	GTEX	Normal Tissue	Colon	GTEX Colon	1.034
GTEX-145MO-2426-SM-5NQ9W	GTEX-145MO-2426-SM-5NQ9W	GTEX	Normal Tissue	Colon	GTEX Colon	0.9963
GTEX-ZDYS-2326-SM-4WKG6	GTEX-ZDYS-2326-SM-4WKG6	GTEX	Normal Tissue	Colon	GTEX Colon	0.9914
GTEX-P78B-1726-SM-3P5ZV	GTEX-P78B-1726-SM-3P5ZV	GTEX	Normal Tissue	Colon	GTEX Colon	0.99
GTEX-OXRK-1726-SM-3NB16	GTEX-OXRK-1726-SM-3NB16	GTEX	Normal Tissue	Colon	GTEX Colon	0.9858
GTEX-11EMC-1426-SM-5N9E4	GTEX-11EMC-1426-SM-5N9E4	GTEX	Normal Tissue	Colon	GTEX Colon	0.9763
GTEX-YEC3-2026-SM-4WWFL	GTEX-YEC3-2026-SM-4WWFL	GTEX	Normal Tissue	Colon	GTEX Colon	0.9652
GTEX-11TTK-2426-SM-5PNYO	GTEX-11TTK-2426-SM-5PNYO	GTEX	Normal Tissue	Colon	GTEX Colon	0.9398
GTEX-14A5I-2426-SM-5Q5CP	GTEX-14A5I-2426-SM-5Q5CP	GTEX	Normal Tissue	Colon	GTEX Colon	0.9315
GTEX-OHPM-1426-SM-3TW8Y	GTEX-OHPM-1426-SM-3TW8Y	GTEX	Normal Tissue	Colon	GTEX Colon	0.9163
GTEX-OXRL-1426-SM-3NM9E	GTEX-OXRL-1426-SM-3NM9E	GTEX	Normal Tissue	Colon	GTEX Colon	0.8958
GTEX-145LS-2726-SM-5Q5D8	GTEX-145LS-2726-SM-5Q5D8	GTEX	Normal Tissue	Colon	GTEX Colon	0.8647
GTEX-O5YW-1426-SM-3MJHF	GTEX-O5YW-1426-SM-3MJHF	GTEX	Normal Tissue	Colon	GTEX Colon	0.8379
GTEX-111CU-1226-SM-5EGIN	GTEX-111CU-1226-SM-5EGIN	GTEX	Normal Tissue	Colon	GTEX Colon	0
GTEX-11EQ9-1426-SM-5987G	GTEX-11EQ9-1426-SM-5987G	GTEX	Normal Tissue	Colon	GTEX Colon	0
GTEX-11I78-1226-SM-5A5K6	GTEX-11I78-1226-SM-5A5K6	GTEX	Normal Tissue	Colon	GTEX Colon	0
GTEX-11NSD-1626-SM-5986U	GTEX-11NSD-1626-SM-5986U	GTEX	Normal Tissue	Colon	GTEX Colon	0
GTEX-11O72-2226-SM-5PNW2	GTEX-11O72-2226-SM-5PNW2	GTEX	Normal Tissue	Colon	GTEX Colon	0
GTEX-11ONC-1926-SM-5GU75	GTEX-11ONC-1926-SM-5GU75	GTEX	Normal Tissue	Colon	GTEX Colon	0
GTEX-11ONC-2026-SM-5HL61	GTEX-11ONC-2026-SM-5HL61	GTEX	Normal Tissue	Colon	GTEX Colon	0
GTEX-11P7K-1526-SM-5EGI7	GTEX-11P7K-1526-SM-5EGI7	GTEX	Normal Tissue	Colon	GTEX Colon	0
GTEX-11P7K-1826-SM-5HL5A	GTEX-11P7K-1826-SM-5HL5A	GTEX	Normal Tissue	Colon	GTEX Colon	0
GTEX-11P82-1026-SM-5BC5J	GTEX-11P82-1026-SM-5BC5J	GTEX	Normal Tissue	Colon	GTEX Colon	0
GTEX-11PRG-2026-SM-5GU5F	GTEX-11PRG-2026-SM-5GU5F	GTEX	Normal Tissue	Colon	GTEX Colon	0
GTEX-11TT1-0926-SM-5GU5M	GTEX-11TT1-0926-SM-5GU5M	GTEX	Normal Tissue	Colon	GTEX Colon	0
GTEX-1211K-1726-SM-5FQUJ	GTEX-1211K-1726-SM-5FQUJ	GTEX	Normal Tissue	Colon	GTEX Colon	0
GTEX-1211K-1826-SM-5EGJ2	GTEX-1211K-1826-SM-5EGJ2	GTEX	Normal Tissue	Colon	GTEX Colon	0
GTEX-12BJ1-2026-SM-5FQUH	GTEX-12BJ1-2026-SM-5FQUH	GTEX	Normal Tissue	Colon	GTEX Colon	0
GTEX-12WSL-1626-SM-5GCMU	GTEX-12WSL-1626-SM-5GCMU	GTEX	Normal Tissue	Colon	GTEX Colon	0
GTEX-13111-0726-SM-5DUVE	GTEX-13111-0726-SM-5DUVE	GTEX	Normal Tissue	Colon	GTEX Colon	0
GTEX-13113-1426-SM-5EGHU	GTEX-13113-1426-SM-5EGHU	GTEX	Normal Tissue	Colon	GTEX Colon	0
GTEX-132NY-2726-SM-5PNY2	GTEX-132NY-2726-SM-5PNY2	GTEX	Normal Tissue	Colon	GTEX Colon	0
GTEX-1339X-1726-SM-5P9J9	GTEX-1339X-1726-SM-5P9J9	GTEX	Normal Tissue	Colon	GTEX Colon	0
GTEX-133LE-1526-SM-5IFEN	GTEX-133LE-1526-SM-5IFEN	GTEX	Normal Tissue	Colon	GTEX Colon	0
GTEX-1399R-2126-SM-5K7WZ	GTEX-1399R-2126-SM-5K7WZ	GTEX	Normal Tissue	Colon	GTEX Colon	0
GTEX-1399R-2226-SM-5P9JB	GTEX-1399R-2226-SM-5P9JB	GTEX	Normal Tissue	Colon	GTEX Colon	0
GTEX-1399S-1926-SM-5J2M5	GTEX-1399S-1926-SM-5J2M5	GTEX	Normal Tissue	Colon	GTEX Colon	0
GTEX-139T6-1326-SM-5IFFO	GTEX-139T6-1326-SM-5IFFO	GTEX	Normal Tissue	Colon	GTEX Colon	0
GTEX-13CF3-1326-SM-5LZXZ	GTEX-13CF3-1326-SM-5LZXZ	GTEX	Normal Tissue	Colon	GTEX Colon	0
GTEX-13CF3-1426-SM-5K7YY	GTEX-13CF3-1426-SM-5K7YY	GTEX	Normal Tissue	Colon	GTEX Colon	0
GTEX-13N2G-2226-SM-5IJCU	GTEX-13N2G-2226-SM-5IJCU	GTEX	Normal Tissue	Colon	GTEX Colon	0
GTEX-13O1R-2426-SM-5KLZZ	GTEX-13O1R-2426-SM-5KLZZ	GTEX	Normal Tissue	Colon	GTEX Colon	0
GTEX-13O21-2426-SM-5MR4A	GTEX-13O21-2426-SM-5MR4A	GTEX	Normal Tissue	Colon	GTEX Colon	0
GTEX-13O61-1526-SM-5KM3P	GTEX-13O61-1526-SM-5KM3P	GTEX	Normal Tissue	Colon	GTEX Colon	0
GTEX-13OVG-1426-SM-5K7VP	GTEX-13OVG-1426-SM-5K7VP	GTEX	Normal Tissue	Colon	GTEX Colon	0
GTEX-13OVI-2126-SM-5KM3U	GTEX-13OVI-2126-SM-5KM3U	GTEX	Normal Tissue	Colon	GTEX Colon	0
GTEX-13OVJ-1826-SM-5KM2D	GTEX-13OVJ-1826-SM-5KM2D	GTEX	Normal Tissue	Colon	GTEX Colon	0
GTEX-13PL7-2526-SM-5IFGR	GTEX-13PL7-2526-SM-5IFGR	GTEX	Normal Tissue	Colon	GTEX Colon	0
GTEX-13PVQ-2726-SM-5L3H7	GTEX-13PVQ-2726-SM-5L3H7	GTEX	Normal Tissue	Colon	GTEX Colon	0
GTEX-13PVR-1726-SM-5Q5EC	GTEX-13PVR-1726-SM-5Q5EC	GTEX	Normal Tissue	Colon	GTEX Colon	0
GTEX-13U4I-2426-SM-5LU34	GTEX-13U4I-2426-SM-5LU34	GTEX	Normal Tissue	Colon	GTEX Colon	0
GTEX-13U4I-2626-SM-5SI9C	GTEX-13U4I-2626-SM-5SI9C	GTEX	Normal Tissue	Colon	GTEX Colon	0
GTEX-13X6I-2726-SM-5Q5ET	GTEX-13X6I-2726-SM-5Q5ET	GTEX	Normal Tissue	Colon	GTEX Colon	0
GTEX-13X6K-2726-SM-5O9DG	GTEX-13X6K-2726-SM-5O9DG	GTEX	Normal Tissue	Colon	GTEX Colon	0
GTEX-145ME-1126-SM-5SIAT	GTEX-145ME-1126-SM-5SIAT	GTEX	Normal Tissue	Colon	GTEX Colon	0
GTEX-145MN-1726-SM-5SIA6	GTEX-145MN-1726-SM-5SIA6	GTEX	Normal Tissue	Colon	GTEX Colon	0
GTEX-145MO-2626-SM-5QGPD	GTEX-145MO-2626-SM-5QGPD	GTEX	Normal Tissue	Colon	GTEX Colon	0
GTEX-147F3-1926-SM-5SIB9	GTEX-147F3-1926-SM-5SIB9	GTEX	Normal Tissue	Colon	GTEX Colon	0
GTEX-148VJ-2426-SM-5NQ9Y	GTEX-148VJ-2426-SM-5NQ9Y	GTEX	Normal Tissue	Colon	GTEX Colon	0
GTEX-148VJ-2626-SM-5QGPI	GTEX-148VJ-2626-SM-5QGPI	GTEX	Normal Tissue	Colon	GTEX Colon	0
GTEX-14A5H-1626-SM-5SIAN	GTEX-14A5H-1626-SM-5SIAN	GTEX	Normal Tissue	Colon	GTEX Colon	0
GTEX-14BMU-1326-SM-5RQIH	GTEX-14BMU-1326-SM-5RQIH	GTEX	Normal Tissue	Colon	GTEX Colon	0
GTEX-14C38-2626-SM-5RQI4	GTEX-14C38-2626-SM-5RQI4	GTEX	Normal Tissue	Colon	GTEX Colon	0
GTEX-14C39-1626-SM-5S2P4	GTEX-14C39-1626-SM-5S2P4	GTEX	Normal Tissue	Colon	GTEX Colon	0
GTEX-14DAR-1526-SM-5RQIX	GTEX-14DAR-1526-SM-5RQIX	GTEX	Normal Tissue	Colon	GTEX Colon	0
GTEX-NFK9-2026-SM-3LK5K	GTEX-NFK9-2026-SM-3LK5K	GTEX	Normal Tissue	Colon	GTEX Colon	0
GTEX-OIZH-1426-SM-3NB1O	GTEX-OIZH-1426-SM-3NB1O	GTEX	Normal Tissue	Colon	GTEX Colon	0
GTEX-PWN1-1426-SM-48TDF	GTEX-PWN1-1426-SM-48TDF	GTEX	Normal Tissue	Colon	GTEX Colon	0
GTEX-Q2AH-1226-SM-48TZL	GTEX-Q2AH-1226-SM-48TZL	GTEX	Normal Tissue	Colon	GTEX Colon	0
GTEX-Q734-1126-SM-48TZY	GTEX-Q734-1126-SM-48TZY	GTEX	Normal Tissue	Colon	GTEX Colon	0
GTEX-QEL4-1926-SM-4R1JI	GTEX-QEL4-1926-SM-4R1JI	GTEX	Normal Tissue	Colon	GTEX Colon	0
GTEX-QLQ7-1126-SM-4R1KN	GTEX-QLQ7-1126-SM-4R1KN	GTEX	Normal Tissue	Colon	GTEX Colon	0
GTEX-QLQW-0426-SM-447A7	GTEX-QLQW-0426-SM-447A7	GTEX	Normal Tissue	Colon	GTEX Colon	0
GTEX-QV31-0826-SM-4R1KR	GTEX-QV31-0826-SM-4R1KR	GTEX	Normal Tissue	Colon	GTEX Colon	0
GTEX-R55D-1826-SM-48FEF	GTEX-R55D-1826-SM-48FEF	GTEX	Normal Tissue	Colon	GTEX Colon	0
GTEX-R55G-1226-SM-48FDC	GTEX-R55G-1226-SM-48FDC	GTEX	Normal Tissue	Colon	GTEX Colon	0
GTEX-S341-1426-SM-4AD6U	GTEX-S341-1426-SM-4AD6U	GTEX	Normal Tissue	Colon	GTEX Colon	0
GTEX-S4Q7-0826-SM-4AD5E	GTEX-S4Q7-0826-SM-4AD5E	GTEX	Normal Tissue	Colon	GTEX Colon	0
GTEX-SE5C-1526-SM-4BRWU	GTEX-SE5C-1526-SM-4BRWU	GTEX	Normal Tissue	Colon	GTEX Colon	0
GTEX-SUCS-1026-SM-5CHTC	GTEX-SUCS-1026-SM-5CHTC	GTEX	Normal Tissue	Colon	GTEX Colon	0
GTEX-T5JW-1126-SM-4DM5V	GTEX-T5JW-1126-SM-4DM5V	GTEX	Normal Tissue	Colon	GTEX Colon	0
GTEX-TKQ1-0626-SM-4DXTS	GTEX-TKQ1-0626-SM-4DXTS	GTEX	Normal Tissue	Colon	GTEX Colon	0
GTEX-TKQ2-1326-SM-4DXT9	GTEX-TKQ2-1326-SM-4DXT9	GTEX	Normal Tissue	Colon	GTEX Colon	0
GTEX-U3ZM-1126-SM-4DXUB	GTEX-U3ZM-1126-SM-4DXUB	GTEX	Normal Tissue	Colon	GTEX Colon	0
GTEX-UJHI-1126-SM-4IHLN	GTEX-UJHI-1126-SM-4IHLN	GTEX	Normal Tissue	Colon	GTEX Colon	0
GTEX-UJMC-1326-SM-4IHLS	GTEX-UJMC-1326-SM-4IHLS	GTEX	Normal Tissue	Colon	GTEX Colon	0
GTEX-W5WG-2426-SM-4LMI6	GTEX-W5WG-2426-SM-4LMI6	GTEX	Normal Tissue	Colon	GTEX Colon	0
GTEX-WFG7-1526-SM-4LVMG	GTEX-WFG7-1526-SM-4LVMG	GTEX	Normal Tissue	Colon	GTEX Colon	0
GTEX-WFG8-1526-SM-5CHSI	GTEX-WFG8-1526-SM-5CHSI	GTEX	Normal Tissue	Colon	GTEX Colon	0
GTEX-WFG8-1726-SM-4LVM6	GTEX-WFG8-1726-SM-4LVM6	GTEX	Normal Tissue	Colon	GTEX Colon	0
GTEX-WFG8-1726-SM-5CHTE	GTEX-WFG8-1726-SM-5CHTE	GTEX	Normal Tissue	Colon	GTEX Colon	0
GTEX-WFON-1426-SM-5CHT1	GTEX-WFON-1426-SM-5CHT1	GTEX	Normal Tissue	Colon	GTEX Colon	0
GTEX-WH7G-1326-SM-4LVMS	GTEX-WH7G-1326-SM-4LVMS	GTEX	Normal Tissue	Colon	GTEX Colon	0
GTEX-WH7G-1426-SM-4LVMU	GTEX-WH7G-1426-SM-4LVMU	GTEX	Normal Tissue	Colon	GTEX Colon	0
GTEX-WHWD-1526-SM-4OORV	GTEX-WHWD-1526-SM-4OORV	GTEX	Normal Tissue	Colon	GTEX Colon	0
GTEX-WI4N-2226-SM-4OOS9	GTEX-WI4N-2226-SM-4OOS9	GTEX	Normal Tissue	Colon	GTEX Colon	0
GTEX-WOFM-1926-SM-4OOSP	GTEX-WOFM-1926-SM-4OOSP	GTEX	Normal Tissue	Colon	GTEX Colon	0
GTEX-WOFM-2026-SM-4OOSQ	GTEX-WOFM-2026-SM-4OOSQ	GTEX	Normal Tissue	Colon	GTEX Colon	0
GTEX-WQUQ-2526-SM-4MVNO	GTEX-WQUQ-2526-SM-4MVNO	GTEX	Normal Tissue	Colon	GTEX Colon	0
GTEX-WYJK-2326-SM-4ONDN	GTEX-WYJK-2326-SM-4ONDN	GTEX	Normal Tissue	Colon	GTEX Colon	0
GTEX-X3Y1-1726-SM-4PQZL	GTEX-X3Y1-1726-SM-4PQZL	GTEX	Normal Tissue	Colon	GTEX Colon	0
GTEX-X5EB-1126-SM-46MVV	GTEX-X5EB-1126-SM-46MVV	GTEX	Normal Tissue	Colon	GTEX Colon	0
GTEX-XAJ8-0726-SM-47JY5	GTEX-XAJ8-0726-SM-47JY5	GTEX	Normal Tissue	Colon	GTEX Colon	0
GTEX-XBEW-1926-SM-4SOJO	GTEX-XBEW-1926-SM-4SOJO	GTEX	Normal Tissue	Colon	GTEX Colon	0
GTEX-XGQ4-1226-SM-4AT67	GTEX-XGQ4-1226-SM-4AT67	GTEX	Normal Tissue	Colon	GTEX Colon	0
GTEX-XQ8I-2126-SM-4BOOM	GTEX-XQ8I-2126-SM-4BOOM	GTEX	Normal Tissue	Colon	GTEX Colon	0
GTEX-XUJ4-2026-SM-4BOOW	GTEX-XUJ4-2026-SM-4BOOW	GTEX	Normal Tissue	Colon	GTEX Colon	0
GTEX-XUJ4-2126-SM-4BOOX	GTEX-XUJ4-2126-SM-4BOOX	GTEX	Normal Tissue	Colon	GTEX Colon	0
GTEX-XUZC-1326-SM-4BRV2	GTEX-XUZC-1326-SM-4BRV2	GTEX	Normal Tissue	Colon	GTEX Colon	0
GTEX-Y3IK-1826-SM-4WWDS	GTEX-Y3IK-1826-SM-4WWDS	GTEX	Normal Tissue	Colon	GTEX Colon	0
GTEX-Y5V6-1626-SM-4VDT2	GTEX-Y5V6-1626-SM-4VDT2	GTEX	Normal Tissue	Colon	GTEX Colon	0
GTEX-Y8E4-2426-SM-4WWDN	GTEX-Y8E4-2426-SM-4WWDN	GTEX	Normal Tissue	Colon	GTEX Colon	0
GTEX-YEC3-2026-SM-5CVLQ	GTEX-YEC3-2026-SM-5CVLQ	GTEX	Normal Tissue	Colon	GTEX Colon	0
GTEX-YEC4-1926-SM-5IFHJ	GTEX-YEC4-1926-SM-5IFHJ	GTEX	Normal Tissue	Colon	GTEX Colon	0
GTEX-YF7O-1626-SM-5IFII	GTEX-YF7O-1626-SM-5IFII	GTEX	Normal Tissue	Colon	GTEX Colon	0
GTEX-ZA64-1426-SM-5CVMC	GTEX-ZA64-1426-SM-5CVMC	GTEX	Normal Tissue	Colon	GTEX Colon	0
GTEX-ZAB5-1426-SM-5HL9D	GTEX-ZAB5-1426-SM-5HL9D	GTEX	Normal Tissue	Colon	GTEX Colon	0
GTEX-ZF28-2526-SM-57WFH	GTEX-ZF28-2526-SM-57WFH	GTEX	Normal Tissue	Colon	GTEX Colon	0
GTEX-ZG7Y-1826-SM-4WWD3	GTEX-ZG7Y-1826-SM-4WWD3	GTEX	Normal Tissue	Colon	GTEX Colon	0
GTEX-ZLFU-1426-SM-4WWEU	GTEX-ZLFU-1426-SM-4WWEU	GTEX	Normal Tissue	Colon	GTEX Colon	0
GTEX-ZLV1-1226-SM-4WWBX	GTEX-ZLV1-1226-SM-4WWBX	GTEX	Normal Tissue	Colon	GTEX Colon	0
GTEX-ZP4G-1526-SM-57WE5	GTEX-ZP4G-1526-SM-57WE5	GTEX	Normal Tissue	Colon	GTEX Colon	0
GTEX-ZPIC-2626-SM-57WE2	GTEX-ZPIC-2626-SM-57WE2	GTEX	Normal Tissue	Colon	GTEX Colon	0
GTEX-ZQUD-1026-SM-4YCEZ	GTEX-ZQUD-1026-SM-4YCEZ	GTEX	Normal Tissue	Colon	GTEX Colon	0
GTEX-ZT9W-1726-SM-51MS3	GTEX-ZT9W-1726-SM-51MS3	GTEX	Normal Tissue	Colon	GTEX Colon	0
GTEX-ZTSS-1126-SM-5985O	GTEX-ZTSS-1126-SM-5985O	GTEX	Normal Tissue	Colon	GTEX Colon	0
GTEX-ZTSS-1226-SM-51MSZ	GTEX-ZTSS-1226-SM-51MSZ	GTEX	Normal Tissue	Colon	GTEX Colon	0
GTEX-ZVT2-1726-SM-51MRO	GTEX-ZVT2-1726-SM-51MRO	GTEX	Normal Tissue	Colon	GTEX Colon	0
GTEX-ZVZQ-2626-SM-59HLB	GTEX-ZVZQ-2626-SM-59HLB	GTEX	Normal Tissue	Colon	GTEX Colon	0
GTEX-ZYFD-2226-SM-5E43P	GTEX-ZYFD-2226-SM-5E43P	GTEX	Normal Tissue	Colon	GTEX Colon	0
GTEX-ZYFG-1826-SM-5GZWX	GTEX-ZYFG-1826-SM-5GZWX	GTEX	Normal Tissue	Colon	GTEX Colon	0
GTEX-ZYFG-1926-SM-5GID5	GTEX-ZYFG-1926-SM-5GID5	GTEX	Normal Tissue	Colon	GTEX Colon	0
GTEX-ZYVF-2826-SM-5GIDK	GTEX-ZYVF-2826-SM-5GIDK	GTEX	Normal Tissue	Colon	GTEX Colon	0
GTEX-12WSJ-1526-SM-5GCNI	GTEX-12WSJ-1526-SM-5GCNI	GTEX	Normal Tissue	Colon	GTEX Colon	0
TCGA-NH-A8F7-06	TCGA-NH-A8F7-06	TCGA	Metastatic	Colon	TCGA Colon Adenocarcinoma	2.994
TCGA-G4-6317-02	TCGA-G4-6317-02	TCGA	Recurrent Tumor	Colon	TCGA Colon Adenocarcinoma	4.22
TCGA-AZ-6605-11	TCGA-AZ-6605-11	TCGA	Solid Tissue Normal	Colon		2.794
TCGA-AZ-6600-11	TCGA-AZ-6600-11	TCGA	Solid Tissue Normal	Colon		2.455
TCGA-A6-2675-11	TCGA-A6-2675-11	TCGA	Solid Tissue Normal	Colon		2.446
TCGA-AA-3713-11	TCGA-AA-3713-11	TCGA	Solid Tissue Normal	Colon		2.42
TCGA-AA-3534-11	TCGA-AA-3534-11	TCGA	Solid Tissue Normal	Colon		2.342
TCGA-AA-3511-11	TCGA-AA-3511-11	TCGA	Solid Tissue Normal	Colon		2.256
TCGA-AA-3527-11	TCGA-AA-3527-11	TCGA	Solid Tissue Normal	Colon		2.207
TCGA-A6-5662-11	TCGA-A6-5662-11	TCGA	Solid Tissue Normal	Colon		2.16
TCGA-A6-2682-11	TCGA-A6-2682-11	TCGA	Solid Tissue Normal	Colon		2.158
TCGA-F4-6704-11	TCGA-F4-6704-11	TCGA	Solid Tissue Normal	Colon		2.142
TCGA-AA-3489-11	TCGA-AA-3489-11	TCGA	Solid Tissue Normal	Colon		2.141
TCGA-A6-2686-11	TCGA-A6-2686-11	TCGA	Solid Tissue Normal	Colon		2.128
TCGA-A6-2685-11	TCGA-A6-2685-11	TCGA	Solid Tissue Normal	Colon		1.877
TCGA-AA-3712-11	TCGA-AA-3712-11	TCGA	Solid Tissue Normal	Colon		1.845
TCGA-AZ-6603-11	TCGA-AZ-6603-11	TCGA	Solid Tissue Normal	Colon		1.793
TCGA-AA-3520-11	TCGA-AA-3520-11	TCGA	Solid Tissue Normal	Colon		1.76
TCGA-A6-2679-11	TCGA-A6-2679-11	TCGA	Solid Tissue Normal	Colon		1.758
TCGA-AZ-6598-11	TCGA-AZ-6598-11	TCGA	Solid Tissue Normal	Colon		1.711
TCGA-A6-5665-11	TCGA-A6-5665-11	TCGA	Solid Tissue Normal	Colon		1.643
TCGA-AA-3697-11	TCGA-AA-3697-11	TCGA	Solid Tissue Normal	Colon		1.631
TCGA-A6-2671-11	TCGA-A6-2671-11	TCGA	Solid Tissue Normal	Colon		1.63
TCGA-AA-3663-11	TCGA-AA-3663-11	TCGA	Solid Tissue Normal	Colon		1.479
TCGA-AZ-6601-11	TCGA-AZ-6601-11	TCGA	Solid Tissue Normal	Colon		1.411
TCGA-A6-2684-11	TCGA-A6-2684-11	TCGA	Solid Tissue Normal	Colon		1.401
TCGA-A6-5667-11	TCGA-A6-5667-11	TCGA	Solid Tissue Normal	Colon		1.358
TCGA-AA-3655-11	TCGA-AA-3655-11	TCGA	Solid Tissue Normal	Colon		1.318
TCGA-A6-2683-11	TCGA-A6-2683-11	TCGA	Solid Tissue Normal	Colon		1.197
TCGA-AA-3496-11	TCGA-AA-3496-11	TCGA	Solid Tissue Normal	Colon		1.074
TCGA-AA-3518-11	TCGA-AA-3518-11	TCGA	Solid Tissue Normal	Colon		0.8066
TCGA-AA-3514-11	TCGA-AA-3514-11	TCGA	Solid Tissue Normal	Colon		0.7997
TCGA-AA-3531-11	TCGA-AA-3531-11	TCGA	Solid Tissue Normal	Colon		0.7754
TCGA-A6-2680-11	TCGA-A6-2680-11	TCGA	Solid Tissue Normal	Colon		0.7649
TCGA-A6-2678-11	TCGA-A6-2678-11	TCGA	Solid Tissue Normal	Colon		0.7405
TCGA-AA-3522-11	TCGA-AA-3522-11	TCGA	Solid Tissue Normal	Colon		0.692
TCGA-AA-3517-11	TCGA-AA-3517-11	TCGA	Solid Tissue Normal	Colon		0.6587
TCGA-A6-5659-11	TCGA-A6-5659-11	TCGA	Solid Tissue Normal	Colon		0
TCGA-AA-3516-11	TCGA-AA-3516-11	TCGA	Solid Tissue Normal	Colon		0
TCGA-AA-3525-11	TCGA-AA-3525-11	TCGA	Solid Tissue Normal	Colon		0
TCGA-AA-3660-11	TCGA-AA-3660-11	TCGA	Solid Tissue Normal	Colon		0
TCGA-AA-3662-11	TCGA-AA-3662-11	TCGA	Solid Tissue Normal	Colon		0
TCGA-AZ-6599-11	TCGA-AZ-6599-11	TCGA	Solid Tissue Normal	Colon		0
TCGA-AA-3495-01	TCGA-AA-3495-01	TCGA	Primary Tumor	Colon	TCGA Colon Adenocarcinoma	6.909
TCGA-A6-5666-01	TCGA-A6-5666-01	TCGA	Primary Tumor	Colon	TCGA Colon Adenocarcinoma	6.891
TCGA-D5-5541-01	TCGA-D5-5541-01	TCGA	Primary Tumor	Colon	TCGA Colon Adenocarcinoma	6.81
TCGA-A6-2677-01	TCGA-A6-2677-01	TCGA	Primary Tumor	Colon	TCGA Colon Adenocarcinoma	6.803
TCGA-AA-3685-01	TCGA-AA-3685-01	TCGA	Primary Tumor	Colon	TCGA Colon Adenocarcinoma	6.63
TCGA-G4-6626-01	TCGA-G4-6626-01	TCGA	Primary Tumor	Colon	TCGA Colon Adenocarcinoma	6.617
TCGA-AA-3663-01	TCGA-AA-3663-01	TCGA	Primary Tumor	Colon	TCGA Colon Adenocarcinoma	6.524
TCGA-G4-6309-01	TCGA-G4-6309-01	TCGA	Primary Tumor	Colon	TCGA Colon Adenocarcinoma	6.514
TCGA-D5-6923-01	TCGA-D5-6923-01	TCGA	Primary Tumor	Colon	TCGA Colon Adenocarcinoma	6.47
TCGA-A6-2686-01	TCGA-A6-2686-01	TCGA	Primary Tumor	Colon	TCGA Colon Adenocarcinoma	6.445
TCGA-AM-5820-01	TCGA-AM-5820-01	TCGA	Primary Tumor	Colon	TCGA Colon Adenocarcinoma	6.431
TCGA-5M-AATA-01	TCGA-5M-AATA-01	TCGA	Primary Tumor	Colon	TCGA Colon Adenocarcinoma	6.426
TCGA-CM-6164-01	TCGA-CM-6164-01	TCGA	Primary Tumor	Colon	TCGA Colon Adenocarcinoma	6.306
TCGA-AA-A01Z-01	TCGA-AA-A01Z-01	TCGA	Primary Tumor	Colon	TCGA Colon Adenocarcinoma	6.302
TCGA-A6-6780-01	TCGA-A6-6780-01	TCGA	Primary Tumor	Colon	TCGA Colon Adenocarcinoma	6.267
TCGA-CK-4948-01	TCGA-CK-4948-01	TCGA	Primary Tumor	Colon	TCGA Colon Adenocarcinoma	6.223
TCGA-G4-6628-01	TCGA-G4-6628-01	TCGA	Primary Tumor	Colon	TCGA Colon Adenocarcinoma	6.213
TCGA-CA-5256-01	TCGA-CA-5256-01	TCGA	Primary Tumor	Colon	TCGA Colon Adenocarcinoma	6.207
TCGA-SS-A7HO-01	TCGA-SS-A7HO-01	TCGA	Primary Tumor	Colon	TCGA Colon Adenocarcinoma	6.205
TCGA-F4-6808-01	TCGA-F4-6808-01	TCGA	Primary Tumor	Colon	TCGA Colon Adenocarcinoma	6.152
TCGA-D5-6898-01	TCGA-D5-6898-01	TCGA	Primary Tumor	Colon	TCGA Colon Adenocarcinoma	6.123
TCGA-A6-5667-01	TCGA-A6-5667-01	TCGA	Primary Tumor	Colon	TCGA Colon Adenocarcinoma	6.122
TCGA-5M-AAT6-01	TCGA-5M-AAT6-01	TCGA	Primary Tumor	Colon	TCGA Colon Adenocarcinoma	6.119
TCGA-AY-6197-01	TCGA-AY-6197-01	TCGA	Primary Tumor	Colon	TCGA Colon Adenocarcinoma	6.109
TCGA-AA-3496-01	TCGA-AA-3496-01	TCGA	Primary Tumor	Colon	TCGA Colon Adenocarcinoma	6.087
TCGA-CM-6676-01	TCGA-CM-6676-01	TCGA	Primary Tumor	Colon	TCGA Colon Adenocarcinoma	6.083
TCGA-AD-6548-01	TCGA-AD-6548-01	TCGA	Primary Tumor	Colon	TCGA Colon Adenocarcinoma	6.071
TCGA-AA-3662-01	TCGA-AA-3662-01	TCGA	Primary Tumor	Colon	TCGA Colon Adenocarcinoma	6.07
TCGA-D5-6926-01	TCGA-D5-6926-01	TCGA	Primary Tumor	Colon	TCGA Colon Adenocarcinoma	6.069
TCGA-DM-A0XD-01	TCGA-DM-A0XD-01	TCGA	Primary Tumor	Colon	TCGA Colon Adenocarcinoma	6.062
TCGA-A6-6648-01	TCGA-A6-6648-01	TCGA	Primary Tumor	Colon	TCGA Colon Adenocarcinoma	6.035
TCGA-A6-3809-01	TCGA-A6-3809-01	TCGA	Primary Tumor	Colon	TCGA Colon Adenocarcinoma	6.033
TCGA-CA-6715-01	TCGA-CA-6715-01	TCGA	Primary Tumor	Colon	TCGA Colon Adenocarcinoma	6.031
TCGA-NH-A50T-01	TCGA-NH-A50T-01	TCGA	Primary Tumor	Colon	TCGA Colon Adenocarcinoma	5.987
TCGA-AD-A5EK-01	TCGA-AD-A5EK-01	TCGA	Primary Tumor	Colon	TCGA Colon Adenocarcinoma	5.975
TCGA-A6-5656-01	TCGA-A6-5656-01	TCGA	Primary Tumor	Colon	TCGA Colon Adenocarcinoma	5.944
TCGA-G4-6299-01	TCGA-G4-6299-01	TCGA	Primary Tumor	Colon	TCGA Colon Adenocarcinoma	5.938
TCGA-AA-3526-01	TCGA-AA-3526-01	TCGA	Primary Tumor	Colon	TCGA Colon Adenocarcinoma	5.916
TCGA-A6-5659-01	TCGA-A6-5659-01	TCGA	Primary Tumor	Colon	TCGA Colon Adenocarcinoma	5.895
TCGA-A6-6650-01	TCGA-A6-6650-01	TCGA	Primary Tumor	Colon	TCGA Colon Adenocarcinoma	5.877
TCGA-D5-6537-01	TCGA-D5-6537-01	TCGA	Primary Tumor	Colon	TCGA Colon Adenocarcinoma	5.865
TCGA-D5-6927-01	TCGA-D5-6927-01	TCGA	Primary Tumor	Colon	TCGA Colon Adenocarcinoma	5.855
TCGA-D5-6932-01	TCGA-D5-6932-01	TCGA	Primary Tumor	Colon	TCGA Colon Adenocarcinoma	5.842
TCGA-CM-6166-01	TCGA-CM-6166-01	TCGA	Primary Tumor	Colon	TCGA Colon Adenocarcinoma	5.823
TCGA-DM-A1DB-01	TCGA-DM-A1DB-01	TCGA	Primary Tumor	Colon	TCGA Colon Adenocarcinoma	5.806
TCGA-D5-6532-01	TCGA-D5-6532-01	TCGA	Primary Tumor	Colon	TCGA Colon Adenocarcinoma	5.792
TCGA-5M-AAT4-01	TCGA-5M-AAT4-01	TCGA	Primary Tumor	Colon	TCGA Colon Adenocarcinoma	5.779
TCGA-NH-A6GB-01	TCGA-NH-A6GB-01	TCGA	Primary Tumor	Colon	TCGA Colon Adenocarcinoma	5.765
TCGA-CK-4951-01	TCGA-CK-4951-01	TCGA	Primary Tumor	Colon	TCGA Colon Adenocarcinoma	5.744
TCGA-A6-A567-01	TCGA-A6-A567-01	TCGA	Primary Tumor	Colon	TCGA Colon Adenocarcinoma	5.735
TCGA-T9-A92H-01	TCGA-T9-A92H-01	TCGA	Primary Tumor	Colon	TCGA Colon Adenocarcinoma	5.729
TCGA-AZ-4682-01	TCGA-AZ-4682-01	TCGA	Primary Tumor	Colon	TCGA Colon Adenocarcinoma	5.709
TCGA-F4-6459-01	TCGA-F4-6459-01	TCGA	Primary Tumor	Colon	TCGA Colon Adenocarcinoma	5.707
TCGA-G4-6317-01	TCGA-G4-6317-01	TCGA	Primary Tumor	Colon	TCGA Colon Adenocarcinoma	5.692
TCGA-A6-2682-01	TCGA-A6-2682-01	TCGA	Primary Tumor	Colon	TCGA Colon Adenocarcinoma	5.635
TCGA-CM-6677-01	TCGA-CM-6677-01	TCGA	Primary Tumor	Colon	TCGA Colon Adenocarcinoma	5.564
TCGA-CA-5255-01	TCGA-CA-5255-01	TCGA	Primary Tumor	Colon	TCGA Colon Adenocarcinoma	5.548
TCGA-CM-6168-01	TCGA-CM-6168-01	TCGA	Primary Tumor	Colon	TCGA Colon Adenocarcinoma	5.521
TCGA-DM-A28E-01	TCGA-DM-A28E-01	TCGA	Primary Tumor	Colon	TCGA Colon Adenocarcinoma	5.464
TCGA-AA-3655-01	TCGA-AA-3655-01	TCGA	Primary Tumor	Colon	TCGA Colon Adenocarcinoma	5.459
TCGA-AA-3660-01	TCGA-AA-3660-01	TCGA	Primary Tumor	Colon	TCGA Colon Adenocarcinoma	5.451
TCGA-A6-6137-01	TCGA-A6-6137-01	TCGA	Primary Tumor	Colon	TCGA Colon Adenocarcinoma	5.449
TCGA-D5-6533-01	TCGA-D5-6533-01	TCGA	Primary Tumor	Colon	TCGA Colon Adenocarcinoma	5.445
TCGA-CA-5254-01	TCGA-CA-5254-01	TCGA	Primary Tumor	Colon	TCGA Colon Adenocarcinoma	5.444
TCGA-NH-A50U-01	TCGA-NH-A50U-01	TCGA	Primary Tumor	Colon	TCGA Colon Adenocarcinoma	5.436
TCGA-D5-6931-01	TCGA-D5-6931-01	TCGA	Primary Tumor	Colon	TCGA Colon Adenocarcinoma	5.427
TCGA-NH-A8F7-01	TCGA-NH-A8F7-01	TCGA	Primary Tumor	Colon	TCGA Colon Adenocarcinoma	5.427
TCGA-5M-AATE-01	TCGA-5M-AATE-01	TCGA	Primary Tumor	Colon	TCGA Colon Adenocarcinoma	5.402
TCGA-D5-6922-01	TCGA-D5-6922-01	TCGA	Primary Tumor	Colon	TCGA Colon Adenocarcinoma	5.367
TCGA-A6-6782-01	TCGA-A6-6782-01	TCGA	Primary Tumor	Colon	TCGA Colon Adenocarcinoma	5.359
TCGA-AD-6963-01	TCGA-AD-6963-01	TCGA	Primary Tumor	Colon	TCGA Colon Adenocarcinoma	5.357
TCGA-DM-A28H-01	TCGA-DM-A28H-01	TCGA	Primary Tumor	Colon	TCGA Colon Adenocarcinoma	5.318
TCGA-QG-A5YW-01	TCGA-QG-A5YW-01	TCGA	Primary Tumor	Colon	TCGA Colon Adenocarcinoma	5.308
TCGA-AA-A02K-01	TCGA-AA-A02K-01	TCGA	Primary Tumor	Colon	TCGA Colon Adenocarcinoma	5.307
TCGA-A6-6652-01	TCGA-A6-6652-01	TCGA	Primary Tumor	Colon	TCGA Colon Adenocarcinoma	5.304
TCGA-CA-6717-01	TCGA-CA-6717-01	TCGA	Primary Tumor	Colon	TCGA Colon Adenocarcinoma	5.269
TCGA-QG-A5YX-01	TCGA-QG-A5YX-01	TCGA	Primary Tumor	Colon	TCGA Colon Adenocarcinoma	5.255
TCGA-AZ-6603-01	TCGA-AZ-6603-01	TCGA	Primary Tumor	Colon	TCGA Colon Adenocarcinoma	5.232
TCGA-AD-5900-01	TCGA-AD-5900-01	TCGA	Primary Tumor	Colon	TCGA Colon Adenocarcinoma	5.218
TCGA-DM-A0X9-01	TCGA-DM-A0X9-01	TCGA	Primary Tumor	Colon	TCGA Colon Adenocarcinoma	5.212
TCGA-D5-6929-01	TCGA-D5-6929-01	TCGA	Primary Tumor	Colon	TCGA Colon Adenocarcinoma	5.207
TCGA-AZ-6608-01	TCGA-AZ-6608-01	TCGA	Primary Tumor	Colon	TCGA Colon Adenocarcinoma	5.205
TCGA-AZ-6600-01	TCGA-AZ-6600-01	TCGA	Primary Tumor	Colon	TCGA Colon Adenocarcinoma	5.188
TCGA-G4-6306-01	TCGA-G4-6306-01	TCGA	Primary Tumor	Colon	TCGA Colon Adenocarcinoma	5.174
TCGA-CM-6161-01	TCGA-CM-6161-01	TCGA	Primary Tumor	Colon	TCGA Colon Adenocarcinoma	5.16
TCGA-AD-6890-01	TCGA-AD-6890-01	TCGA	Primary Tumor	Colon	TCGA Colon Adenocarcinoma	5.12
TCGA-AA-A02Y-01	TCGA-AA-A02Y-01	TCGA	Primary Tumor	Colon	TCGA Colon Adenocarcinoma	5.12
TCGA-CM-5868-01	TCGA-CM-5868-01	TCGA	Primary Tumor	Colon	TCGA Colon Adenocarcinoma	5.119
TCGA-F4-6854-01	TCGA-F4-6854-01	TCGA	Primary Tumor	Colon	TCGA Colon Adenocarcinoma	5.114
TCGA-CM-5864-01	TCGA-CM-5864-01	TCGA	Primary Tumor	Colon	TCGA Colon Adenocarcinoma	5.108
TCGA-A6-6140-01	TCGA-A6-6140-01	TCGA	Primary Tumor	Colon	TCGA Colon Adenocarcinoma	5.104
TCGA-CK-6746-01	TCGA-CK-6746-01	TCGA	Primary Tumor	Colon	TCGA Colon Adenocarcinoma	5.096
TCGA-DM-A285-01	TCGA-DM-A285-01	TCGA	Primary Tumor	Colon	TCGA Colon Adenocarcinoma	5.068
TCGA-AY-A8YK-01	TCGA-AY-A8YK-01	TCGA	Primary Tumor	Colon	TCGA Colon Adenocarcinoma	5.032
TCGA-AA-3697-01	TCGA-AA-3697-01	TCGA	Primary Tumor	Colon	TCGA Colon Adenocarcinoma	5.028
TCGA-CK-5915-01	TCGA-CK-5915-01	TCGA	Primary Tumor	Colon	TCGA Colon Adenocarcinoma	5.024
TCGA-G4-6307-01	TCGA-G4-6307-01	TCGA	Primary Tumor	Colon	TCGA Colon Adenocarcinoma	5.016
TCGA-D5-7000-01	TCGA-D5-7000-01	TCGA	Primary Tumor	Colon	TCGA Colon Adenocarcinoma	5.009
TCGA-NH-A5IV-01	TCGA-NH-A5IV-01	TCGA	Primary Tumor	Colon	TCGA Colon Adenocarcinoma	5.004
TCGA-G4-6311-01	TCGA-G4-6311-01	TCGA	Primary Tumor	Colon	TCGA Colon Adenocarcinoma	4.961
TCGA-CM-4743-01	TCGA-CM-4743-01	TCGA	Primary Tumor	Colon	TCGA Colon Adenocarcinoma	4.956
TCGA-3L-AA1B-01	TCGA-3L-AA1B-01	TCGA	Primary Tumor	Colon	TCGA Colon Adenocarcinoma	4.923
TCGA-CM-6678-01	TCGA-CM-6678-01	TCGA	Primary Tumor	Colon	TCGA Colon Adenocarcinoma	4.919
TCGA-AD-6899-01	TCGA-AD-6899-01	TCGA	Primary Tumor	Colon	TCGA Colon Adenocarcinoma	4.905
TCGA-CM-6170-01	TCGA-CM-6170-01	TCGA	Primary Tumor	Colon	TCGA Colon Adenocarcinoma	4.891
TCGA-F4-6809-01	TCGA-F4-6809-01	TCGA	Primary Tumor	Colon	TCGA Colon Adenocarcinoma	4.876
TCGA-AA-3489-01	TCGA-AA-3489-01	TCGA	Primary Tumor	Colon	TCGA Colon Adenocarcinoma	4.876
TCGA-AZ-4616-01	TCGA-AZ-4616-01	TCGA	Primary Tumor	Colon	TCGA Colon Adenocarcinoma	4.834
TCGA-D5-5540-01	TCGA-D5-5540-01	TCGA	Primary Tumor	Colon	TCGA Colon Adenocarcinoma	4.824
TCGA-CK-4947-01	TCGA-CK-4947-01	TCGA	Primary Tumor	Colon	TCGA Colon Adenocarcinoma	4.8
TCGA-D5-6529-01	TCGA-D5-6529-01	TCGA	Primary Tumor	Colon	TCGA Colon Adenocarcinoma	4.799
TCGA-A6-5660-01	TCGA-A6-5660-01	TCGA	Primary Tumor	Colon	TCGA Colon Adenocarcinoma	4.792
TCGA-AA-3511-01	TCGA-AA-3511-01	TCGA	Primary Tumor	Colon	TCGA Colon Adenocarcinoma	4.782
TCGA-AZ-5403-01	TCGA-AZ-5403-01	TCGA	Primary Tumor	Colon	TCGA Colon Adenocarcinoma	4.776
TCGA-DM-A0XF-01	TCGA-DM-A0XF-01	TCGA	Primary Tumor	Colon	TCGA Colon Adenocarcinoma	4.767
TCGA-AZ-4614-01	TCGA-AZ-4614-01	TCGA	Primary Tumor	Colon	TCGA Colon Adenocarcinoma	4.747
TCGA-AD-6964-01	TCGA-AD-6964-01	TCGA	Primary Tumor	Colon	TCGA Colon Adenocarcinoma	4.746
TCGA-A6-2674-01	TCGA-A6-2674-01	TCGA	Primary Tumor	Colon	TCGA Colon Adenocarcinoma	4.738
TCGA-G4-6303-01	TCGA-G4-6303-01	TCGA	Primary Tumor	Colon	TCGA Colon Adenocarcinoma	4.736
TCGA-5M-AAT5-01	TCGA-5M-AAT5-01	TCGA	Primary Tumor	Colon	TCGA Colon Adenocarcinoma	4.733
TCGA-D5-5537-01	TCGA-D5-5537-01	TCGA	Primary Tumor	Colon	TCGA Colon Adenocarcinoma	4.728
TCGA-D5-6930-01	TCGA-D5-6930-01	TCGA	Primary Tumor	Colon	TCGA Colon Adenocarcinoma	4.717
TCGA-AM-5821-01	TCGA-AM-5821-01	TCGA	Primary Tumor	Colon	TCGA Colon Adenocarcinoma	4.7
TCGA-CK-5916-01	TCGA-CK-5916-01	TCGA	Primary Tumor	Colon	TCGA Colon Adenocarcinoma	4.692
TCGA-CK-4950-01	TCGA-CK-4950-01	TCGA	Primary Tumor	Colon	TCGA Colon Adenocarcinoma	4.672
TCGA-DM-A28F-01	TCGA-DM-A28F-01	TCGA	Primary Tumor	Colon	TCGA Colon Adenocarcinoma	4.666
TCGA-AZ-5407-01	TCGA-AZ-5407-01	TCGA	Primary Tumor	Colon	TCGA Colon Adenocarcinoma	4.661
TCGA-AZ-6605-01	TCGA-AZ-6605-01	TCGA	Primary Tumor	Colon	TCGA Colon Adenocarcinoma	4.653
TCGA-NH-A6GA-01	TCGA-NH-A6GA-01	TCGA	Primary Tumor	Colon	TCGA Colon Adenocarcinoma	4.604
TCGA-CM-6163-01	TCGA-CM-6163-01	TCGA	Primary Tumor	Colon	TCGA Colon Adenocarcinoma	4.589
TCGA-AZ-6598-01	TCGA-AZ-6598-01	TCGA	Primary Tumor	Colon	TCGA Colon Adenocarcinoma	4.58
TCGA-D5-6920-01	TCGA-D5-6920-01	TCGA	Primary Tumor	Colon	TCGA Colon Adenocarcinoma	4.563
TCGA-AU-6004-01	TCGA-AU-6004-01	TCGA	Primary Tumor	Colon	TCGA Colon Adenocarcinoma	4.554
TCGA-G4-6588-01	TCGA-G4-6588-01	TCGA	Primary Tumor	Colon	TCGA Colon Adenocarcinoma	4.542
TCGA-CM-6165-01	TCGA-CM-6165-01	TCGA	Primary Tumor	Colon	TCGA Colon Adenocarcinoma	4.54
TCGA-AA-A01X-01	TCGA-AA-A01X-01	TCGA	Primary Tumor	Colon	TCGA Colon Adenocarcinoma	4.532
TCGA-A6-6653-01	TCGA-A6-6653-01	TCGA	Primary Tumor	Colon	TCGA Colon Adenocarcinoma	4.53
TCGA-A6-5665-01	TCGA-A6-5665-01	TCGA	Primary Tumor	Colon	TCGA Colon Adenocarcinoma	4.525
TCGA-G4-6294-01	TCGA-G4-6294-01	TCGA	Primary Tumor	Colon	TCGA Colon Adenocarcinoma	4.523
TCGA-D5-6924-01	TCGA-D5-6924-01	TCGA	Primary Tumor	Colon	TCGA Colon Adenocarcinoma	4.507
TCGA-G4-6295-01	TCGA-G4-6295-01	TCGA	Primary Tumor	Colon	TCGA Colon Adenocarcinoma	4.466
TCGA-CM-6169-01	TCGA-CM-6169-01	TCGA	Primary Tumor	Colon	TCGA Colon Adenocarcinoma	4.43
TCGA-NH-A50V-01	TCGA-NH-A50V-01	TCGA	Primary Tumor	Colon	TCGA Colon Adenocarcinoma	4.429
TCGA-G4-6304-01	TCGA-G4-6304-01	TCGA	Primary Tumor	Colon	TCGA Colon Adenocarcinoma	4.428
TCGA-F4-6805-01	TCGA-F4-6805-01	TCGA	Primary Tumor	Colon	TCGA Colon Adenocarcinoma	4.427
TCGA-AA-3509-01	TCGA-AA-3509-01	TCGA	Primary Tumor	Colon	TCGA Colon Adenocarcinoma	4.408
TCGA-CM-4751-01	TCGA-CM-4751-01	TCGA	Primary Tumor	Colon	TCGA Colon Adenocarcinoma	4.406
TCGA-DM-A1D9-01	TCGA-DM-A1D9-01	TCGA	Primary Tumor	Colon	TCGA Colon Adenocarcinoma	4.4
TCGA-AA-3506-01	TCGA-AA-3506-01	TCGA	Primary Tumor	Colon	TCGA Colon Adenocarcinoma	4.396
TCGA-DM-A28A-01	TCGA-DM-A28A-01	TCGA	Primary Tumor	Colon	TCGA Colon Adenocarcinoma	4.39
TCGA-D5-6531-01	TCGA-D5-6531-01	TCGA	Primary Tumor	Colon	TCGA Colon Adenocarcinoma	4.389
TCGA-G4-6298-01	TCGA-G4-6298-01	TCGA	Primary Tumor	Colon	TCGA Colon Adenocarcinoma	4.376
TCGA-RU-A8FL-01	TCGA-RU-A8FL-01	TCGA	Primary Tumor	Colon	TCGA Colon Adenocarcinoma	4.366
TCGA-AZ-4684-01	TCGA-AZ-4684-01	TCGA	Primary Tumor	Colon	TCGA Colon Adenocarcinoma	4.365
TCGA-CK-5912-01	TCGA-CK-5912-01	TCGA	Primary Tumor	Colon	TCGA Colon Adenocarcinoma	4.349
TCGA-F4-6855-01	TCGA-F4-6855-01	TCGA	Primary Tumor	Colon	TCGA Colon Adenocarcinoma	4.345
TCGA-F4-6806-01	TCGA-F4-6806-01	TCGA	Primary Tumor	Colon	TCGA Colon Adenocarcinoma	4.327
TCGA-D5-6541-01	TCGA-D5-6541-01	TCGA	Primary Tumor	Colon	TCGA Colon Adenocarcinoma	4.318
TCGA-NH-A8F8-01	TCGA-NH-A8F8-01	TCGA	Primary Tumor	Colon	TCGA Colon Adenocarcinoma	4.316
TCGA-G4-6627-01	TCGA-G4-6627-01	TCGA	Primary Tumor	Colon	TCGA Colon Adenocarcinoma	4.292
TCGA-CK-5913-01	TCGA-CK-5913-01	TCGA	Primary Tumor	Colon	TCGA Colon Adenocarcinoma	4.268
TCGA-AZ-4315-01	TCGA-AZ-4315-01	TCGA	Primary Tumor	Colon	TCGA Colon Adenocarcinoma	4.262
TCGA-QG-A5YV-01	TCGA-QG-A5YV-01	TCGA	Primary Tumor	Colon	TCGA Colon Adenocarcinoma	4.248
TCGA-G4-6315-01	TCGA-G4-6315-01	TCGA	Primary Tumor	Colon	TCGA Colon Adenocarcinoma	4.241
TCGA-AD-6888-01	TCGA-AD-6888-01	TCGA	Primary Tumor	Colon	TCGA Colon Adenocarcinoma	4.237
TCGA-A6-2675-01	TCGA-A6-2675-01	TCGA	Primary Tumor	Colon	TCGA Colon Adenocarcinoma	4.224
TCGA-CA-6719-01	TCGA-CA-6719-01	TCGA	Primary Tumor	Colon	TCGA Colon Adenocarcinoma	4.202
TCGA-A6-5657-01	TCGA-A6-5657-01	TCGA	Primary Tumor	Colon	TCGA Colon Adenocarcinoma	4.192
TCGA-QG-A5Z2-01	TCGA-QG-A5Z2-01	TCGA	Primary Tumor	Colon	TCGA Colon Adenocarcinoma	4.192
TCGA-DM-A1D4-01	TCGA-DM-A1D4-01	TCGA	Primary Tumor	Colon	TCGA Colon Adenocarcinoma	4.181
TCGA-DM-A1DA-01	TCGA-DM-A1DA-01	TCGA	Primary Tumor	Colon	TCGA Colon Adenocarcinoma	4.173
TCGA-AY-A54L-01	TCGA-AY-A54L-01	TCGA	Primary Tumor	Colon	TCGA Colon Adenocarcinoma	4.171
TCGA-DM-A28G-01	TCGA-DM-A28G-01	TCGA	Primary Tumor	Colon	TCGA Colon Adenocarcinoma	4.163
TCGA-CM-5344-01	TCGA-CM-5344-01	TCGA	Primary Tumor	Colon	TCGA Colon Adenocarcinoma	4.129
TCGA-A6-6138-01	TCGA-A6-6138-01	TCGA	Primary Tumor	Colon	TCGA Colon Adenocarcinoma	4.125
TCGA-AA-3675-01	TCGA-AA-3675-01	TCGA	Primary Tumor	Colon	TCGA Colon Adenocarcinoma	4.103
TCGA-F4-6569-01	TCGA-F4-6569-01	TCGA	Primary Tumor	Colon	TCGA Colon Adenocarcinoma	4.095
TCGA-CM-6172-01	TCGA-CM-6172-01	TCGA	Primary Tumor	Colon	TCGA Colon Adenocarcinoma	4.08
TCGA-AU-3779-01	TCGA-AU-3779-01	TCGA	Primary Tumor	Colon	TCGA Colon Adenocarcinoma	4.067
TCGA-G4-6322-01	TCGA-G4-6322-01	TCGA	Primary Tumor	Colon	TCGA Colon Adenocarcinoma	4.064
TCGA-QL-A97D-01	TCGA-QL-A97D-01	TCGA	Primary Tumor	Colon	TCGA Colon Adenocarcinoma	4.037
TCGA-A6-4105-01	TCGA-A6-4105-01	TCGA	Primary Tumor	Colon	TCGA Colon Adenocarcinoma	4.024
TCGA-CM-5861-01	TCGA-CM-5861-01	TCGA	Primary Tumor	Colon	TCGA Colon Adenocarcinoma	4.022
TCGA-4N-A93T-01	TCGA-4N-A93T-01	TCGA	Primary Tumor	Colon	TCGA Colon Adenocarcinoma	4.017
TCGA-CA-5797-01	TCGA-CA-5797-01	TCGA	Primary Tumor	Colon	TCGA Colon Adenocarcinoma	3.997
TCGA-G4-6314-01	TCGA-G4-6314-01	TCGA	Primary Tumor	Colon	TCGA Colon Adenocarcinoma	3.994
TCGA-A6-6651-01	TCGA-A6-6651-01	TCGA	Primary Tumor	Colon	TCGA Colon Adenocarcinoma	3.992
TCGA-D5-6535-01	TCGA-D5-6535-01	TCGA	Primary Tumor	Colon	TCGA Colon Adenocarcinoma	3.973
TCGA-AD-6965-01	TCGA-AD-6965-01	TCGA	Primary Tumor	Colon	TCGA Colon Adenocarcinoma	3.969
TCGA-DM-A28M-01	TCGA-DM-A28M-01	TCGA	Primary Tumor	Colon	TCGA Colon Adenocarcinoma	3.926
TCGA-CM-4744-01	TCGA-CM-4744-01	TCGA	Primary Tumor	Colon	TCGA Colon Adenocarcinoma	3.907
TCGA-AZ-6606-01	TCGA-AZ-6606-01	TCGA	Primary Tumor	Colon	TCGA Colon Adenocarcinoma	3.896
TCGA-A6-2685-01	TCGA-A6-2685-01	TCGA	Primary Tumor	Colon	TCGA Colon Adenocarcinoma	3.855
TCGA-DM-A1D8-01	TCGA-DM-A1D8-01	TCGA	Primary Tumor	Colon	TCGA Colon Adenocarcinoma	3.855
TCGA-CM-5862-01	TCGA-CM-5862-01	TCGA	Primary Tumor	Colon	TCGA Colon Adenocarcinoma	3.803
TCGA-CK-6751-01	TCGA-CK-6751-01	TCGA	Primary Tumor	Colon	TCGA Colon Adenocarcinoma	3.801
TCGA-DM-A288-01	TCGA-DM-A288-01	TCGA	Primary Tumor	Colon	TCGA Colon Adenocarcinoma	3.762
TCGA-AA-3492-01	TCGA-AA-3492-01	TCGA	Primary Tumor	Colon	TCGA Colon Adenocarcinoma	3.752
TCGA-DM-A282-01	TCGA-DM-A282-01	TCGA	Primary Tumor	Colon	TCGA Colon Adenocarcinoma	3.74
TCGA-A6-6649-01	TCGA-A6-6649-01	TCGA	Primary Tumor	Colon	TCGA Colon Adenocarcinoma	3.737
TCGA-AY-5543-01	TCGA-AY-5543-01	TCGA	Primary Tumor	Colon	TCGA Colon Adenocarcinoma	3.722
TCGA-F4-6856-01	TCGA-F4-6856-01	TCGA	Primary Tumor	Colon	TCGA Colon Adenocarcinoma	3.722
TCGA-CM-6680-01	TCGA-CM-6680-01	TCGA	Primary Tumor	Colon	TCGA Colon Adenocarcinoma	3.721
TCGA-QG-A5Z1-01	TCGA-QG-A5Z1-01	TCGA	Primary Tumor	Colon	TCGA Colon Adenocarcinoma	3.707
TCGA-A6-2684-01	TCGA-A6-2684-01	TCGA	Primary Tumor	Colon	TCGA Colon Adenocarcinoma	3.696
TCGA-A6-6142-01	TCGA-A6-6142-01	TCGA	Primary Tumor	Colon	TCGA Colon Adenocarcinoma	3.69
TCGA-DM-A1HA-01	TCGA-DM-A1HA-01	TCGA	Primary Tumor	Colon	TCGA Colon Adenocarcinoma	3.684
TCGA-A6-5662-01	TCGA-A6-5662-01	TCGA	Primary Tumor	Colon	TCGA Colon Adenocarcinoma	3.676
TCGA-CK-6748-01	TCGA-CK-6748-01	TCGA	Primary Tumor	Colon	TCGA Colon Adenocarcinoma	3.653
TCGA-CM-6674-01	TCGA-CM-6674-01	TCGA	Primary Tumor	Colon	TCGA Colon Adenocarcinoma	3.629
TCGA-CK-5914-01	TCGA-CK-5914-01	TCGA	Primary Tumor	Colon	TCGA Colon Adenocarcinoma	3.617
TCGA-CK-4952-01	TCGA-CK-4952-01	TCGA	Primary Tumor	Colon	TCGA Colon Adenocarcinoma	3.591
TCGA-CM-6679-01	TCGA-CM-6679-01	TCGA	Primary Tumor	Colon	TCGA Colon Adenocarcinoma	3.578
TCGA-AA-3712-01	TCGA-AA-3712-01	TCGA	Primary Tumor	Colon	TCGA Colon Adenocarcinoma	3.531
TCGA-CK-6747-01	TCGA-CK-6747-01	TCGA	Primary Tumor	Colon	TCGA Colon Adenocarcinoma	3.498
TCGA-D5-6540-01	TCGA-D5-6540-01	TCGA	Primary Tumor	Colon	TCGA Colon Adenocarcinoma	3.487
TCGA-D5-6538-01	TCGA-D5-6538-01	TCGA	Primary Tumor	Colon	TCGA Colon Adenocarcinoma	3.474
TCGA-4T-AA8H-01	TCGA-4T-AA8H-01	TCGA	Primary Tumor	Colon	TCGA Colon Adenocarcinoma	3.46
TCGA-A6-A566-01	TCGA-A6-A566-01	TCGA	Primary Tumor	Colon	TCGA Colon Adenocarcinoma	3.439
TCGA-AZ-6601-01	TCGA-AZ-6601-01	TCGA	Primary Tumor	Colon	TCGA Colon Adenocarcinoma	3.384
TCGA-CM-5860-01	TCGA-CM-5860-01	TCGA	Primary Tumor	Colon	TCGA Colon Adenocarcinoma	3.364
TCGA-DM-A1D0-01	TCGA-DM-A1D0-01	TCGA	Primary Tumor	Colon	TCGA Colon Adenocarcinoma	3.333
TCGA-A6-5664-01	TCGA-A6-5664-01	TCGA	Primary Tumor	Colon	TCGA Colon Adenocarcinoma	3.332
TCGA-F4-6463-01	TCGA-F4-6463-01	TCGA	Primary Tumor	Colon	TCGA Colon Adenocarcinoma	3.317
TCGA-F4-6807-01	TCGA-F4-6807-01	TCGA	Primary Tumor	Colon	TCGA Colon Adenocarcinoma	3.291
TCGA-G4-6293-01	TCGA-G4-6293-01	TCGA	Primary Tumor	Colon	TCGA Colon Adenocarcinoma	3.219
TCGA-DM-A280-01	TCGA-DM-A280-01	TCGA	Primary Tumor	Colon	TCGA Colon Adenocarcinoma	3.21
TCGA-G4-6320-01	TCGA-G4-6320-01	TCGA	Primary Tumor	Colon	TCGA Colon Adenocarcinoma	3.178
TCGA-G4-6625-01	TCGA-G4-6625-01	TCGA	Primary Tumor	Colon	TCGA Colon Adenocarcinoma	3.168
TCGA-D5-5538-01	TCGA-D5-5538-01	TCGA	Primary Tumor	Colon	TCGA Colon Adenocarcinoma	3.15
TCGA-G4-6302-01	TCGA-G4-6302-01	TCGA	Primary Tumor	Colon	TCGA Colon Adenocarcinoma	3.106
TCGA-AD-6895-01	TCGA-AD-6895-01	TCGA	Primary Tumor	Colon	TCGA Colon Adenocarcinoma	3.096
TCGA-A6-A565-01	TCGA-A6-A565-01	TCGA	Primary Tumor	Colon	TCGA Colon Adenocarcinoma	3.061
TCGA-A6-6654-01	TCGA-A6-6654-01	TCGA	Primary Tumor	Colon	TCGA Colon Adenocarcinoma	3.057
TCGA-AZ-6599-01	TCGA-AZ-6599-01	TCGA	Primary Tumor	Colon	TCGA Colon Adenocarcinoma	3.047
TCGA-D5-6928-01	TCGA-D5-6928-01	TCGA	Primary Tumor	Colon	TCGA Colon Adenocarcinoma	2.99
TCGA-G4-6586-01	TCGA-G4-6586-01	TCGA	Primary Tumor	Colon	TCGA Colon Adenocarcinoma	2.974
TCGA-A6-3810-01	TCGA-A6-3810-01	TCGA	Primary Tumor	Colon	TCGA Colon Adenocarcinoma	2.915
TCGA-AY-A71X-01	TCGA-AY-A71X-01	TCGA	Primary Tumor	Colon	TCGA Colon Adenocarcinoma	2.896
TCGA-AZ-4313-01	TCGA-AZ-4313-01	TCGA	Primary Tumor	Colon	TCGA Colon Adenocarcinoma	2.862
TCGA-CA-6718-01	TCGA-CA-6718-01	TCGA	Primary Tumor	Colon	TCGA Colon Adenocarcinoma	2.858
TCGA-F4-6460-01	TCGA-F4-6460-01	TCGA	Primary Tumor	Colon	TCGA Colon Adenocarcinoma	2.812
TCGA-DM-A28C-01	TCGA-DM-A28C-01	TCGA	Primary Tumor	Colon	TCGA Colon Adenocarcinoma	2.804
TCGA-CM-5349-01	TCGA-CM-5349-01	TCGA	Primary Tumor	Colon	TCGA Colon Adenocarcinoma	2.787
TCGA-A6-5661-01	TCGA-A6-5661-01	TCGA	Primary Tumor	Colon	TCGA Colon Adenocarcinoma	2.787
TCGA-CM-6167-01	TCGA-CM-6167-01	TCGA	Primary Tumor	Colon	TCGA Colon Adenocarcinoma	2.776
TCGA-A6-6781-01	TCGA-A6-6781-01	TCGA	Primary Tumor	Colon	TCGA Colon Adenocarcinoma	2.757
TCGA-AY-6196-01	TCGA-AY-6196-01	TCGA	Primary Tumor	Colon	TCGA Colon Adenocarcinoma	2.75
TCGA-G4-6310-01	TCGA-G4-6310-01	TCGA	Primary Tumor	Colon	TCGA Colon Adenocarcinoma	2.725
TCGA-D5-5539-01	TCGA-D5-5539-01	TCGA	Primary Tumor	Colon	TCGA Colon Adenocarcinoma	2.689
TCGA-G4-6321-01	TCGA-G4-6321-01	TCGA	Primary Tumor	Colon	TCGA Colon Adenocarcinoma	2.636
TCGA-A6-A56B-01	TCGA-A6-A56B-01	TCGA	Primary Tumor	Colon	TCGA Colon Adenocarcinoma	2.636
TCGA-A6-2672-01	TCGA-A6-2672-01	TCGA	Primary Tumor	Colon	TCGA Colon Adenocarcinoma	2.609
TCGA-CM-4747-01	TCGA-CM-4747-01	TCGA	Primary Tumor	Colon	TCGA Colon Adenocarcinoma	2.596
TCGA-DM-A1D7-01	TCGA-DM-A1D7-01	TCGA	Primary Tumor	Colon	TCGA Colon Adenocarcinoma	2.485
TCGA-DM-A1HB-01	TCGA-DM-A1HB-01	TCGA	Primary Tumor	Colon	TCGA Colon Adenocarcinoma	2.449
TCGA-D5-6530-01	TCGA-D5-6530-01	TCGA	Primary Tumor	Colon	TCGA Colon Adenocarcinoma	2.445
TCGA-CM-5348-01	TCGA-CM-5348-01	TCGA	Primary Tumor	Colon	TCGA Colon Adenocarcinoma	2.384
TCGA-F4-6704-01	TCGA-F4-6704-01	TCGA	Primary Tumor	Colon	TCGA Colon Adenocarcinoma	2.353
TCGA-G4-6297-01	TCGA-G4-6297-01	TCGA	Primary Tumor	Colon	TCGA Colon Adenocarcinoma	2.285
TCGA-CM-6171-01	TCGA-CM-6171-01	TCGA	Primary Tumor	Colon	TCGA Colon Adenocarcinoma	2.252
TCGA-NH-A6GC-01	TCGA-NH-A6GC-01	TCGA	Primary Tumor	Colon	TCGA Colon Adenocarcinoma	2.218
TCGA-CA-5796-01	TCGA-CA-5796-01	TCGA	Primary Tumor	Colon	TCGA Colon Adenocarcinoma	2.204
TCGA-AD-6901-01	TCGA-AD-6901-01	TCGA	Primary Tumor	Colon	TCGA Colon Adenocarcinoma	2.157
TCGA-AY-6386-01	TCGA-AY-6386-01	TCGA	Primary Tumor	Colon	TCGA Colon Adenocarcinoma	2.141
TCGA-AZ-4323-01	TCGA-AZ-4323-01	TCGA	Primary Tumor	Colon	TCGA Colon Adenocarcinoma	2.103
TCGA-CM-5863-01	TCGA-CM-5863-01	TCGA	Primary Tumor	Colon	TCGA Colon Adenocarcinoma	1.992
TCGA-D5-6534-01	TCGA-D5-6534-01	TCGA	Primary Tumor	Colon	TCGA Colon Adenocarcinoma	1.983
TCGA-AZ-4615-01	TCGA-AZ-4615-01	TCGA	Primary Tumor	Colon	TCGA Colon Adenocarcinoma	1.938
TCGA-A6-6141-01	TCGA-A6-6141-01	TCGA	Primary Tumor	Colon	TCGA Colon Adenocarcinoma	1.89
TCGA-F4-6703-01	TCGA-F4-6703-01	TCGA	Primary Tumor	Colon	TCGA Colon Adenocarcinoma	1.798
TCGA-AD-A5EJ-01	TCGA-AD-A5EJ-01	TCGA	Primary Tumor	Colon	TCGA Colon Adenocarcinoma	1.764
TCGA-AA-3502-01	TCGA-AA-3502-01	TCGA	Primary Tumor	Colon	TCGA Colon Adenocarcinoma	1.669
TCGA-CA-6716-01	TCGA-CA-6716-01	TCGA	Primary Tumor	Colon	TCGA Colon Adenocarcinoma	1.6
TCGA-WS-AB45-01	TCGA-WS-AB45-01	TCGA	Primary Tumor	Colon	TCGA Colon Adenocarcinoma	1.574
TCGA-AD-6889-01	TCGA-AD-6889-01	TCGA	Primary Tumor	Colon	TCGA Colon Adenocarcinoma	1.388
TCGA-D5-6539-01	TCGA-D5-6539-01	TCGA	Primary Tumor	Colon	TCGA Colon Adenocarcinoma	1.301
TCGA-CM-6162-01	TCGA-CM-6162-01	TCGA	Primary Tumor	Colon	TCGA Colon Adenocarcinoma	1.249
TCGA-F4-6461-01	TCGA-F4-6461-01	TCGA	Primary Tumor	Colon	TCGA Colon Adenocarcinoma	0.9095
TCGA-DM-A28K-01	TCGA-DM-A28K-01	TCGA	Primary Tumor	Colon	TCGA Colon Adenocarcinoma	0.8729
TCGA-AY-A69D-01	TCGA-AY-A69D-01	TCGA	Primary Tumor	Colon	TCGA Colon Adenocarcinoma	0.723
TCGA-AA-3713-01	TCGA-AA-3713-01	TCGA	Primary Tumor	Colon	TCGA Colon Adenocarcinoma	0.7171
TCGA-CM-6675-01	TCGA-CM-6675-01	TCGA	Primary Tumor	Colon	TCGA Colon Adenocarcinoma	0.7118
